ESSAY

# Bi-directional metabolic reprogramming between cancer cells and T cells reshapes the anti-tumor immune response

Yajing Qiu<sup>1,2</sup>, Yihan Xu<sup>1,2</sup>, Xinyuan Ding<sup>3</sup>, Congcong Zhao<sup>1,2</sup>, Hongcheng Cheng<sup>1,2</sup>, Guideng Li<sup>1,2</sup>

**1** National Key Laboratory of Immunity and Inflammation, Suzhou Institute of Systems Medicine, Chinese Academy of Medical Sciences & Peking Union Medical College, Suzhou, Jiangsu, China, **2** Key Laboratory of Synthetic Biology Regulatory Elements, Suzhou Institute of Systems Medicine, Chinese Academy of Medical Sciences & Peking Union Medical College, Suzhou, Jiangsu, China, **3** Department of Pharmacy, Medical Science University and Suzhou Technology China Innovation Center, The Affiliated Suzhou Hospital of Nanjing Medical University, Suzhou Municipal Hospital, Gusu School of Nanjing Medical University, Suzhou, China

 These authors contributed equally to this work.

‡ HC and GL also contributed equally to this work.

\* [lgd@ism.cams.cn](mailto:lgd@ism.cams.cn) (GL); [chenghongcheng1229@foxmail.com](mailto:chenghongcheng1229@foxmail.com) (HC)

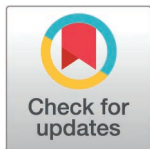

 OPEN ACCESS

**Citation:** Qiu Y, Xu Y, Ding X, Zhao C, Cheng H, Li G (2025) Bi-directional metabolic reprogramming between cancer cells and T cells reshapes the anti-tumor immune response. *PLoS Biol* 23(7): e3003284. <https://doi.org/10.1371/journal.pbio.3003284>

**Academic Editor:** Yibin Kang, Princeton University, UNITED STATES OF AMERICA

**Published:** July 14, 2025

**Copyright:** © 2025 Qiu et al. This is an open access article distributed under the terms of the [Creative Commons Attribution License](https://creativecommons.org/licenses/by/4.0/), which permits unrestricted use, distribution, and reproduction in any medium, provided the original author and source are credited.

**Funding:** The work was supported by the Noncommunicable Chronic Diseases-National Science and Technology Major Project (2024ZD0520600), the National Natural Science Foundation of China (32270994 to G.L.; 32300764 to H.C.), the Non-profit Central Research Institute Fund of the Chinese Academy of Medical Sciences (2021-RC310-014 to G.L.), and the CAMS Innovation Fund for Medical Sciences (CIFMS) (2023-12M-QJ-019,

## Abstract

Cancer cells and T cells engage in dynamic crosstalk within the tumor microenvironment (TME), shaping tumor progression and anti-tumor immunity. While cancer cells reprogram metabolism to support growth and immune evasion, T cells must adapt their metabolic states to maintain effector functions. Tumor-driven metabolic perturbations, such as nutrient depletion and accumulation of immunosuppressive metabolites, profoundly impair T cell function and fate. Conversely, metabolically reprogrammed T cells can modulate the TME and influence tumor growth. This reciprocal metabolic crosstalk represents both metabolic competition and intercellular communication, offering promising therapeutic targets.

## Introduction

Cancer is not only a genetic disease but also a profoundly metabolic one [1]. Within the tumor microenvironment (TME), a dynamic ecosystem composed of cancer cells, immune cells, fibroblasts and vasculature, metabolic reprogramming fuels tumor progression while actively shaping immune responses [2,3]. To meet their high demands for energy and biosynthesis, tumor cells up-regulate glycolysis, glutaminolysis and lipid metabolism. These adaptations support proliferation and survival but simultaneously create a hostile microenvironment defined by nutrient depletion, hypoxia and acidosis [3–9]. Such metabolic remodeling enables immune evasion while directly suppressing the function of cytotoxic T cells [10–13]. Through nutrient competition, tumor cells deprive T cells of glucose, glutamine and amino acids, impairing their

2022-I2M-2-004, and 2023-I2M-2-010 to G.L.). G.L. also received support from the Gusu Innovation and Entrepreneurship Talent Program (ZXL2022503). H.C. received support from the Basic Research Program of Jiangsu (BK20230280). The funders had no role in study design, data collection and analysis, decision to publish, or preparation of the manuscript.

**Competing interests:** The authors have declared that no competing interests exist.

**Abbreviations:** ACSL4, acyl-coenzyme A synthetase long-chain family member 4; AMPK, AMP-activated protein kinase; ATP, adenosine triphosphate; CAR-T, chimeric antigen receptor T; CPT1 $\alpha$ , carnitine palmitoyltransferase 1  $\alpha$ ; CRC, colorectal cancer; EMT, epithelial-mesenchymal transition; FAO, fatty acid oxidation; FBP2, fructose-1,6-bisphosphatase 2; GDP, guanosine diphosphate; GLUT-1, glucose transporter 1; HIF-1 $\alpha$ , hypoxia-inducible factor 1 $\alpha$ ; HK2, hexokinase 2; IDO, indoleamine 2,3-dioxygenase; LDHA, lactate dehydrogenase A; m6A, N6-methyladenosine; OXPHOS, oxidative phosphorylation; PD-1, programmed cell death 1; PKM2, pyruvate kinase M2; PPP, pentose phosphate pathway; PROTACs, proteolysis targeting chimeras; ROS, reactive oxygen species; TCA, tricarboxylic acid; TCR, T cell receptor; Tex, terminally exhausted T cells; TH17, T helper 17; TILs, tumor-infiltrating lymphocytes; TME, tumor microenvironment; TNBC, triple-negative breast cancer; Tpex, progenitor exhausted T cells; Tregs, regulatory T cells.

metabolic fitness, cytokine production and effector activity [7–9,14–16]. Meanwhile, acidification and hypoxia, driven by hypoxia-inducible factor 1 $\alpha$  (HIF-1 $\alpha$ ), favor the accumulation of regulatory T cells (Tregs) and up-regulate checkpoint molecules, further dampening immune surveillance [17–19]. The acidification of the TME in particular is largely due to lactate accumulation, which disrupts T cell proliferation and viability [20,21]. Importantly, T cells themselves are metabolically responsive. In the TME, they undergo substantial metabolic rewiring, which governs their activation, lineage fate and persistence [22–24]. Tregs, in particular, exhibit a metabolic profile well-suited to this hostile environment, relying on oxidative phosphorylation and fatty acid oxidation (FAO) to maintain their suppressive function under hypoxic and nutrient-depleted conditions [23,25–27].

This bidirectional metabolic crosstalk has emerged as a key driver of tumor immune escape and therapy resistance. In response, new therapeutic strategies are being developed that target tumor metabolism while restoring T cell function, such as inhibitors of lactate production and glutaminase activity, metabolic adjuvants (e.g., taurine, acetate) and combination regimens that integrate metabolic reprogramming with immune checkpoint blockade [28–32]. Advances in spatial metabolomics and single-cell multiomics offer powerful tools to dissect this complexity and guide context-specific interventions [33,34].

In this Essay, we discuss how metabolic rewiring in both tumor cells and T cells reshapes the immune landscape and contributes to malignant progression. We highlight emerging strategies that aim to break the metabolic stalemate, opening avenues for precision cancer immunotherapy that targets both metabolism and immunity.

## Metabolic reprogramming in cancer cells

Metabolic reprogramming is recognized as a hallmark of cancer, in which tumor cells reconfigure their metabolic networks to support uncontrolled proliferation, invasion, metastasis and resistance to various forms of regulated cell death (including apoptosis, ferroptosis, pyroptosis and others) [1,35–40]. In this section, we focus on carbohydrate, amino acid and lipid metabolism in cancer cells to explore how these metabolic pathways contribute to tumor progression and therapy resistance.

### Altered carbohydrate metabolism

Glucose is the primary carbohydrate fuel for both normal and malignant cells. In healthy cells, glucose metabolism is mainly metabolized through mitochondrial oxidative phosphorylation (OXPHOS), an energy-efficient process for adenosine triphosphate (ATP) generation [12]. By contrast, many cancer cells elevate glycolysis even under aerobic conditions, known as the “Warburg effect”. This metabolic shift enables rapid production of ATP and biosynthetic intermediates, while also contributing to the acidification of TME, thereby promoting angiogenesis and facilitating immune evasion (Fig 1) [41–44]. Importantly, this reprogramming is tightly linked to multiple signaling pathways that affect tumor growth, invasion and even resistance to chemotherapy [45]. For instance, in colorectal cancer (CRC), B7-H3 enhances glucose uptake and lactate production by upregulating hexokinase 2 (HK2), a critical mediator of

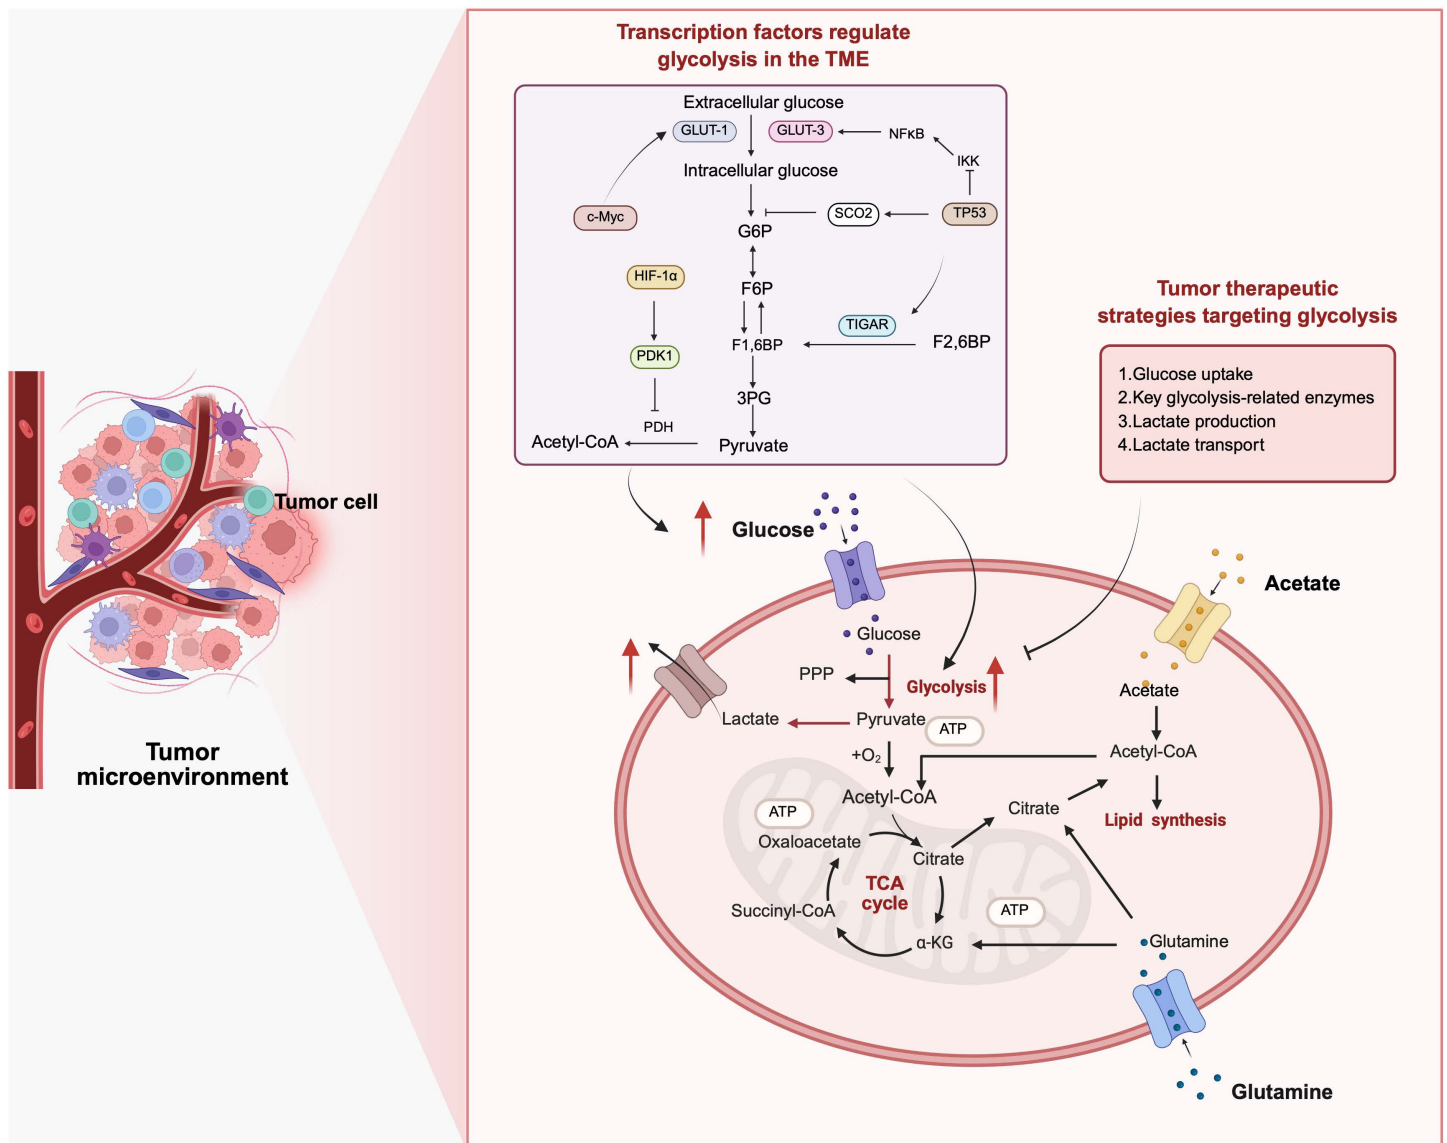

**Fig 1. Metabolic reprogramming in cancer cells.** Glucose metabolism involves both glycolysis and the mitochondrial tricarboxylic acid (TCA) cycle. Cancer cells preferentially adopt aerobic glycolysis, enabling rapid energy production and biosynthesis while contributing to immune evasion. To improve the effectiveness of immunotherapy, strategies to reprogram the tumor microenvironment (TME) are under investigation. Four key intervention points within the glycolytic pathway have been identified: targeting glucose uptake, inhibiting critical glycolytic enzymes, blocking lactate production and blocking lactate export. 3PG, 3-phosphoglyceric acid; ATP, adenosine triphosphate; CoA, coenzyme-A; F1,6 BP, fructose 1,6-bisphosphate; F6P, fructose 6-phosphate; F2,6 BP, fructose 2,6-bisphosphate; G6P, glucose 6-phosphate;  $\alpha$ -KG,  $\alpha$ -ketoglutarate; PDH, pyruvate dehydrogenase; PPP, pentose phosphate pathway. Figure created with BioRender, <https://www.biorender.com>.

<https://doi.org/10.1371/journal.pbio.3003284.g001>

B7-H3-induced chemoresistance in CRC cells [46]. Additionally, lactate has been implicated in promoting angiogenesis by inducing the phosphorylation and subsequent degradation of the transcription factor I $\kappa$ B $\alpha$ , thereby activating an autocrine NF $\kappa$ B–IL-8/CXCL8 signaling pathway [47]. While the exact molecular mechanisms linking aerobic glycolysis to chemoresistance in CRC remain to be fully elucidated, one prevailing hypothesis suggests that the acidic microenvironment and glycolysis-derived metabolic intermediates may influence drug uptake or trigger pro-survival signaling pathways, ultimately reducing the effectiveness of chemotherapeutic agents.

Not all tumors up-regulate glycolysis via the same mechanisms. In esophageal squamous cell carcinoma, enhanced aerobic glycolysis has been attributed to the E3 ubiquitin ligase TRIM33, which mediates p53 degradation through K48-linked ubiquitination. The loss of regulatory control by p53 leads to increased expression of glycolytic enzymes, including glucose transporter 1 (GLUT-1), HK2, pyruvate kinase M2 (PKM2) and lactate dehydrogenase A (LDHA), thereby fueling tumor growth [47]. In parallel, HIF-1 $\alpha$ , which is often stabilized under low-oxygen conditions or activated by oncogenic signaling pathways (e.g., PI3K–AKT, RAS), directly upregulates glycolytic enzymes (e.g., HK2, LDHA, pyruvate dehydrogenase kinase 1) and suppresses mitochondrial pyruvate oxidation [48,49]. This dual role reinforces the glycolytic phenotype and adapts the tumor to fluctuations of oxygen in its environment. Moreover, other signaling axes, such as the IRF2–CENP-N/AKT pathway identified in nasopharyngeal carcinoma, further enhance glycolysis and contribute to the inhibition of apoptotic processes [50].

Beyond glycolysis, alternative carbohydrate pathways also contribute to tumorigenesis. For example, in triple-negative breast cancer (TNBC), impaired mannose metabolism, resulting from reduced expression of guanosine diphosphate (GDP)-mannose pyrophosphorylase A, leads to an accumulation of GDP-mannose. This buildup has been implicated in promoting the degradation of the tumor suppressor BRCA2, which in turn compromises homologous recombination and may increase genomic instability [51]. Such findings highlight that metabolic dysregulation can affect not only energy production but also critical processes such as DNA repair. Furthermore, the interplay between glycolysis and gluconeogenesis adds an additional layer of metabolic complexity. In soft tissue sarcomas, the gluconeogenic enzyme fructose-1,6-bisphosphatase 2 (FBP2) impedes tumor growth through two distinct mechanisms [52]. First, by attenuating the Warburg effect, FBP2 reduces the dependence of tumor cells on glucose metabolism [53]. Second, through a noncanonical interaction with the oncogenic transcription factor c-Myc, FBP2 suppresses c-Myc-dependent expression of mitochondrial transcription factor A, thereby diminishing mitochondrial biogenesis and respiratory activity [52]. This dual function underscores the potential of targeting metabolic flexibility as a therapeutic strategy.

### Reprogramming of amino acid and lipid metabolism

Cancer cells not only rely on enhanced glycolysis but also rewire amino acid and lipid metabolism to meet their high energetic and biosynthetic demands, which in turn supports survival, proliferation and metastatic progression (Fig 1) [12]. For example, in pancreatic ductal adenocarcinoma, succinylation at lysine 311 of kidney-type glutaminase boosts its enzymatic activity, enhancing glutaminolysis and increasing the production of nicotinamide adenine dinucleotide phosphate and glutathione, which in turn supports tumor growth [32]. Moreover, oncogenic factors such as c-Myc can further stimulate the serine synthesis pathway by upregulating enzymes including phosphoglycerate dehydrogenase, phosphoserine aminotransferase 1 and phosphoserine phosphatase. These enzymes not only contribute to de novo serine biosynthesis, which is essential for nucleotide and protein synthesis, but also bolster redox homeostasis by supporting the synthesis of glutathione and other antioxidants [54]. This highlights the importance of amino acid metabolism reprogramming in both supporting rapid cell proliferation and protecting against oxidative damage.

In parallel, cancer cells considerably alter lipid metabolism to facilitate tumor progression, particularly under nutrient-limited conditions. The transcription factor SREBF1 is a key regulator of this process, promoting the expression of lipogenic genes, including *NPC2*. This activation leads to the mobilization of cholesterol and fatty acids from stored lipid droplets, which are then utilized for membrane biosynthesis and energy production, both of which are crucial for supporting rapid tumor cell division [43]. In aggressive cancers such as hepatocellular carcinoma and metastatic breast cancer, acyl-coenzyme A synthetase long-chain family member 4 (ACSL4) has a dual role. ACSL4 enhances FAO to meet high energy demands while also influencing epithelial–mesenchymal transition (EMT) through interactions with transcriptional regulators such as ZEB2, mediated by the c-Myc–SREBP1 pathway [55–58]. This interplay between lipid metabolism and signaling pathways contributes to increased invasiveness and metastatic potential, underscoring the complex impact of lipid metabolic reprogramming on cancer progression.

The convergence of these altered metabolic pathways not only addresses the increased need for energy and biosynthetic precursors but also creates unique metabolic vulnerabilities in cancer cells. These vulnerabilities present potential therapeutic targets. For example, inhibitors of glutaminase or fatty acid synthase, along with lactate transporter blockers, are currently being explored as strategies to disrupt the metabolic balance in tumors [59–64]. Such targeted interventions could sensitize cancer cells to conventional therapies and enhance the effectiveness of immunotherapies by reprogramming the TME. Future research will be essential to better understand the specific metabolic profiles across different cancer subtypes, a key step in advancing precision medicine approaches that exploit these metabolic dependencies.

## Metabolic characteristics of T cells

Similar to cancer cells, T cells also undergo metabolic reprogramming, and their metabolic state is closely linked to their functional status. For instance, naïve T cells maintain longevity primarily through oxidative metabolism, whereas activated effector T cells rapidly shift to glycolysis to support their proliferation and cytokine production. These distinct metabolic programs play a pivotal role in determining T cell fate, persistence and their capacity to mount effective anti-tumor immune responses (Fig 2) [65–67].

### Carbohydrate metabolism

Glucose metabolism is central to T cell activation, differentiation and function. In quiescent naïve and memory T cells, energy demands are relatively low and are primarily met through mitochondrial OXPHOS. Upon antigen recognition however, T cells undergo a metabolic switch to aerobic glycolysis to support rapid proliferation and acquisition of effector function [65,66]. This reprogramming is initiated by T cell receptor (TCR) stimulation, which upregulates the GLUT-1, thereby enhancing glucose uptake (Fig 2) [68]. The imported glucose is converted to pyruvate, which either enter the mitochondria to fuel the tricarboxylic acid (TCA) cycle or is reduced to lactate in the cytosol. TCR signaling also induces the expression of pyruvate dehydrogenase kinase 1, which inhibits the entry of pyruvate into mitochondria, promoting lactate production and enhancing glycolytic flux to sustain T cell activation and function [69,70]. Co-stimulatory signals, particularly through CD28, further amplify GLUT-1 expression and glucose uptake, reinforcing the glycolytic program [71]. The transcription factor c-Myc, which is rapidly induced upon TCR engagement, serves as a master regulator of this process by promoting the expression of glycolytic genes, including glucose transporters and key enzymes such as HK2 and LDHA. Moreover, glycolytic intermediates fuel anabolic pathways such as the pentose phosphate pathway (PPP) and nucleotide biosynthesis, which are essential for biomass accumulation and clonal expansion of proliferating T cells [65,72,73].

By contrast, memory T cells down-regulate mTOR signaling and glycolysis, relying instead on mitochondrial metabolism and FAO for long-term survival. Inhibiting glycolysis during activation, for instance with 2-deoxyglucose, promotes memory T cell formation [74,75]. Glucose restriction also promotes AMP-activated protein kinase (AMPK)-mediated activation of the SENP1–SIRT3 axis, thereby enhancing OXPHOS and mitochondrial fusion, both of which are favorable for memory T cell development [76]. However, augmenting glycolytic metabolism by overexpressing the glycolytic enzyme phosphoglycerate mutase-1 drives T cells toward a terminally differentiated state and limits the formation of long-lived memory T cells, suggesting that a proper balance between glycolysis and mitochondrial metabolism is essential for supporting memory fate commitment [77].

Under conditions of chronic antigen stimulation, T cells gradually acquire a terminally exhausted phenotype, marked by reduced cytokine production and sustained expression of inhibitory receptors such as programmed cell death protein 1 (PD-1), LAG-3 and TIM-3. This process gives rise to two distinct subsets of exhausted T cells: progenitor exhausted T cells (T<sub>pex</sub>) and terminally exhausted T cells (T<sub>ex</sub>) [78,79]. CD8<sup>+</sup> T<sub>pex</sub> and T<sub>ex</sub> exhibit distinct metabolic profiles, particularly in glucose metabolism, which significantly influence their differentiation and functional states. T<sub>pex</sub> maintain a balanced metabolic state, utilizing both OXPHOS and glycolysis. This metabolic flexibility supports their self-renewal capacity and responsiveness to stimuli [80]. By contrast, T<sub>ex</sub> exhibit increased reliance on glycolysis to compensate for severely

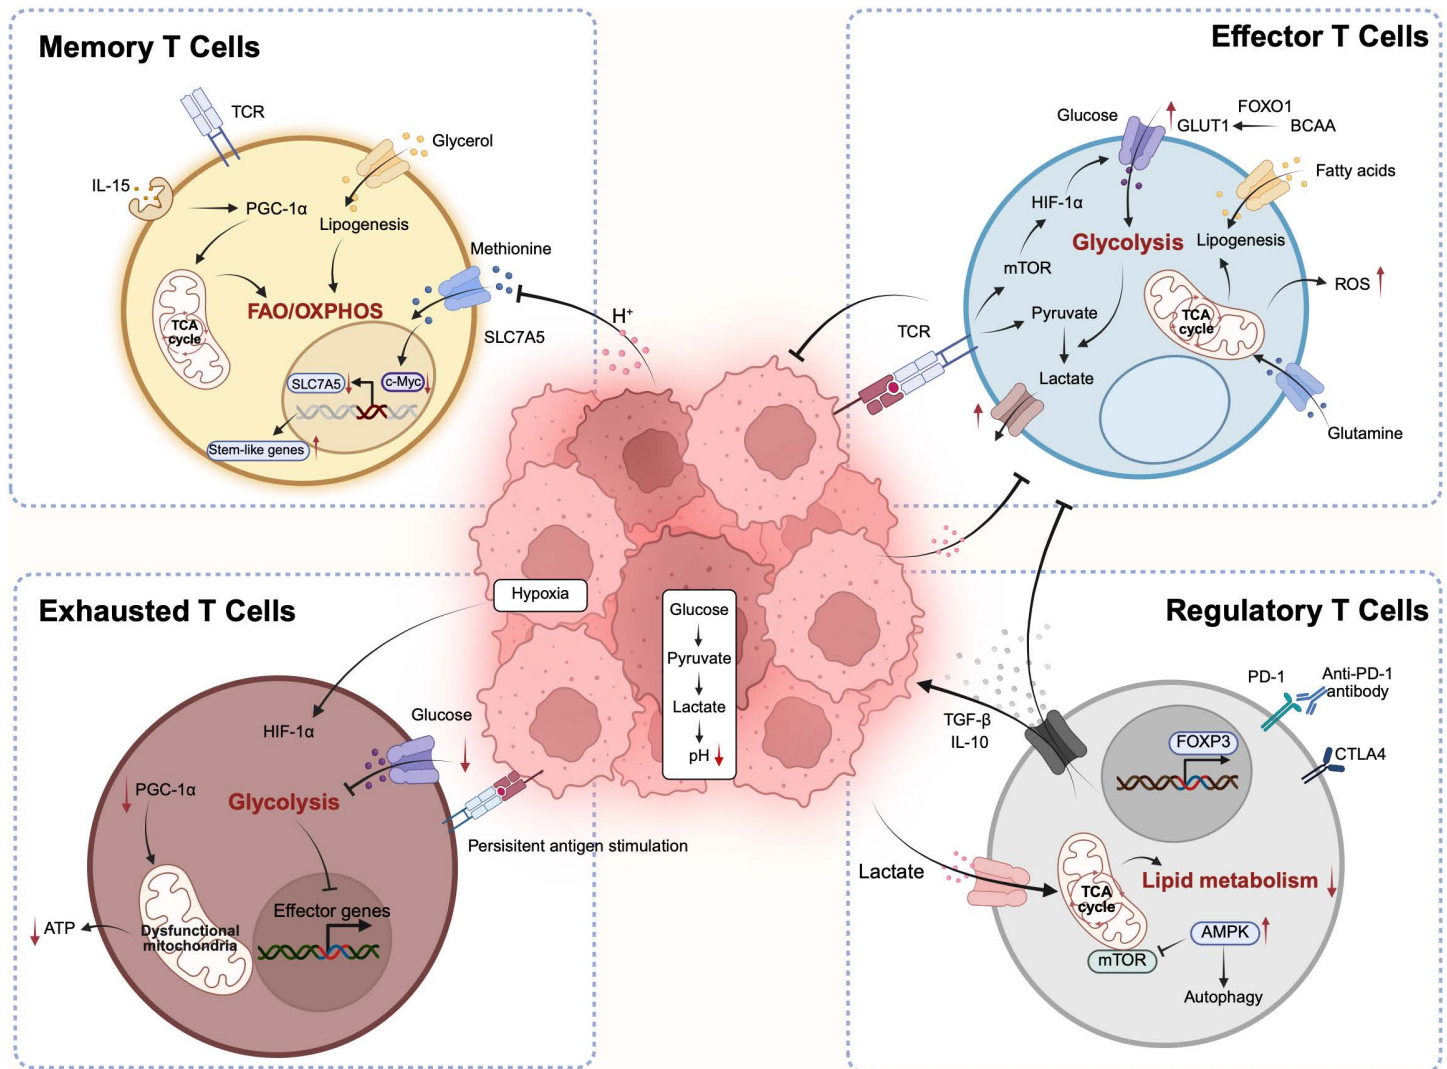

**Fig 2. Metabolic characteristics during T cell differentiation.** Upon activation, naïve T cells undergo metabolic reprogramming and differentiate into effector T cells, shifting toward aerobic glycolysis to support rapid proliferation and effector functions. This transition is accompanied by epigenetic modifications at key gene loci. Following antigen clearance, a subset of T cells differentiates into memory T cells, which revert to utilizing fatty acid oxidation (FAO) and oxidative phosphorylation (OXPHOS) to support long-term survival and functional readiness. By contrast, during chronic antigen stimulation, effector T cells are driven toward an exhausted state, characterized by metabolic reprogramming, mitochondrial dysfunction and impaired effector function. Regulatory T cells (Tregs), an immunosuppressive population that supports tumor progression, rely on OXPHOS and FAO for survival and exert their function through the secretion of inhibitory cytokines such as TGF- $\beta$  and IL-10. ATP, adenosine triphosphate; BCAA, branched-chain amino acid; CTLA4, cytotoxic T-lymphocyte associated protein 4; FOXO1, forkhead box O1; FOXP3, forkhead box P3; GLUT-1, glucose transporter 1; HIF-1 $\alpha$ , hypoxia-inducing factor 1 $\alpha$ ; mTOR, mammalian target of rapamycin; PD-1, programmed cell death protein 1; PGC-1 $\alpha$ , peroxisome proliferator-activated receptor- $\gamma$  coactivator 1- $\alpha$ ; ROS, reactive oxygen species; TCA, tricarboxylic acid cycle; TCR, T cell receptor. Figure created with BioRender, <https://www.biorender.com>.

<https://doi.org/10.1371/journal.pbio.3003284.g002>

impaired OXPHOS, which is accompanied by mitochondrial fragmentation and reactive oxygen species (ROS) accumulation (Fig 2) [81]. Despite enhanced glycolysis, glucose uptake and metabolic function decline, resulting in insufficient energy production. This dual metabolic insufficiency leads to an “energy collapse” state, causing Tex to lose their proliferative capacity and effector functions, ultimately contributing to terminal exhaustion. Additionally, deletion of PKM2 diverts

metabolic flux into the PPP, promoting T<sub>pex</sub> accumulation and enhancing responses to PD-1 blockade *in vivo* [82]. These findings underscore the critical role of metabolic balance in the differentiation of exhausted T cells.

### Amino acid metabolism

In addition to carbohydrate metabolism, amino acid metabolism has vital and multifaceted roles in T cell survival, activation and function (Fig 2) [83]. Upon activation, T cells increase the expression of amino acid transporters and metabolic enzymes to meet elevated biosynthetic and energetic demands, a process driven by TCR signaling and regulated by key energy-regulating factors such as c-Myc, HIF-1 $\alpha$  and mTOR [72,84,85].

Glutamine is a prime example of how amino acid metabolism supports T cell function [86]. Upon activation, T cells significantly increase glutamine uptake to fuel proliferation, effector differentiation and cytokine production [87,88]. Depletion of glutamine impairs these processes, leading to reduced T cell function [89]. Interestingly, limiting glutamine metabolism can also prevent T cell exhaustion and enhance memory T cell formation, promoting long-lasting anti-tumor responses [90]. These findings highlight the context-dependent role of glutamine metabolism in shaping T cell fate. Similarly, L-arginine also supports the generation of central memory-like T cells by shifting metabolism from glycolysis to OXPHOS, thereby enhancing survival and anti-tumor efficacy [91]. Asparagine, although considered non-essential, is critical during T cell activation. Its deprivation disrupts protein synthesis and LCK phosphorylation, thereby impairing T cell activation [92]. Paradoxically, restricting asparagine availability can enhance CD8<sup>+</sup> T cell metabolic fitness through activation the nuclear factor erythroid 2-related factor 2-dependent stress response or ROS-mediated metabolic and signaling adaptations, thereby promoting sustained proliferation and effector function [93]. These opposing effects illustrate how T cells' nutritional demands evolve from activation to memory stages.

Additionally, amino acids such as methionine and cysteine modulate T cell responses in a stage-specific manner [11,94]. Collectively, these findings underscore the pivotal role of amino acid metabolism in shaping T cell immunity, offering promising therapeutic avenues to enhance immune responses through targeted metabolic interventions.

### Lipid metabolism

Effector T cells rely on *de novo* fatty acid synthesis for rapid proliferation, while memory T cells primarily utilize FAO and OXPHOS to support long-term survival and maintain a quiescent state (Fig 2) [95–97]. FAO induction in memory T cells is linked to AMPK activation, a key regulator of catabolic metabolism. Loss of the transcription factor TRAF6 disrupts AMPK signaling, impairing central memory CD8<sup>+</sup> T cell differentiation. However, pharmacological activation of AMPK can restore memory T cell formation [98]. Carnitine palmitoyltransferase 1 $\alpha$  (CPT1 $\alpha$ ) is essential for FAO and the mitochondrial import of long-chain fatty acids [99]. Elevated CPT1 $\alpha$  expression supports the generation of memory CD8<sup>+</sup> T cells, with cytokines such as IL-15 enhancing mitochondrial biogenesis and upregulating CPT1 $\alpha$  [100]. However, the precise role of FAO in memory T cell formation remains debated, as FAO inhibition impairs memory development, yet CPT1 $\alpha$  deletion does not replicate this defect.

Dysregulated lipid metabolism in the TME impairs T cell function and promotes immune evasion. Excessive accumulation of lipids such as cholesterol negatively impacts CD8<sup>+</sup> tumor-infiltrating lymphocytes (TILs). Fatty acid uptake through CD36 induces lipid peroxidation, activating the p38–MAPK pathway or ferroptosis, leading to T cell dysfunction. However, interventions such as CD36 ablation, p38 inhibition or glutathione peroxidase 4 overexpression can restore T cell function [101,102]. In pancreatic cancer, abnormal accumulation of long-chain fatty acids disrupts mitochondrial function by downregulating very-long-chain acyl-CoA dehydrogenase, impairing T cell activity [103]. In metastatic ovarian cancer, TME-induced endoplasmic reticulum stress reduces transgelin-2 expression in CD8<sup>+</sup> TILs, impairing lipid uptake and T cell function. Restoring transgelin-2 expression enhances lipid uptake, mitochondrial respiration and cytotoxic capacity [104]. Dysregulated lipid metabolism within the TME presents a promising target for immune-based therapies. Therapeutic strategies aimed at enhancing FAO in memory T cells or limiting lipid accumulation in TILs may help optimize T cell responses and improve the efficacy of cancer immunotherapy.

## Metabolic characteristics of other subsets T cells

While our previous discussion has focused on the metabolic characteristics of CD8<sup>+</sup> T cells in anti-tumor immunity, it is equally important to consider the metabolic programming of other T cell subsets that regulate anti-tumor immune responses within the TME. In particular, CD4<sup>+</sup> T cell subsets, such as Tregs and T helper 17 (TH17) cells, play distinct roles in shaping anti-tumor responses [25,105–107].

Tregs are indispensable for maintaining immune tolerance and are often co-opted by tumors to suppress antitumor immunity [17]. These cells predominantly rely on OXPHOS and FAO to sustain their survival and immunosuppressive functions under the nutrient-poor and often hypoxic conditions of the TME (Fig 2) [108]. The metabolic programming of Tregs is tightly regulated by TCR signaling and mTOR activity. Notably, deletion of the catalytic subunit of glutamate cysteine ligase in Tregs leads to increased serine metabolism and mTOR activation but downregulates transcription factor FOXP3 expression, impairing suppressive function [108]. Furthermore, the glycolytic enzyme enolase-1 directly binds the FOXP3 promoter, and its deletion increases FOXP3 expression [109], highlighting a tight link between metabolism and Treg stability.

By contrast, TH17 cells adopt a markedly different metabolic profile characterized by a strong reliance on aerobic glycolysis and glutaminolysis to fuel their rapid proliferation and pro-inflammatory effector functions. These metabolic shifts not only meet the bioenergetic and biosynthetic demands of TH17 cells but also critically shape their differentiation and function [110–116]. Pharmacological targeting of TH17 cell metabolism holds therapeutic promise. For example, the antimalarial drug artesunate inhibits IRF4-dependent glycolysis in both murine and human TH17 cells, suppressing their proliferation and differentiation [115]. In addition, overexpression of glycolytic regulators such as PKM2 or the glucose transporter GLUT-3 enhances glycolytic flux, fine-tunes transcription factor STAT3 signaling, and drives glycolysis-dependent epigenetic remodeling, thereby reinforcing TH17 cell differentiation [116,117]. Intriguingly, recent studies have uncovered a sex-specific layer of metabolic regulation. In models of allergic airway inflammation, androgen signaling attenuates glutaminolysis and thereby promotes TH17 cell differentiation [112], uncovering a previously underappreciated link between hormonal cues and TH17 cell differentiation and suggesting novel, sex-specific immunomodulatory strategies.

Given the shared ontogeny and plasticity of Tregs and TH17 cells, a central question is how environmental metabolic cues, such as nutrient availability, hypoxia and immunosuppressive metabolites, tip the balance between these two subsets in the TME. Elucidating this metabolic reprogramming will not only shed light on the mechanisms governing T cell fate decisions but also identify strategies to reprogram CD4<sup>+</sup> T cell responses in favor of effective anti-tumor immunity.

## How metabolic reprogramming of cancer cells and T cells affects tumor progression

Metabolic reprogramming in cancer cells and T cells drives tumor progression by reshaping the TME, altering nutrient availability and influencing immune cell function. In this section, we focus on the metabolic crosstalk between cancer cells and T cells, highlighting how this bi-directional interaction contributes to tumor development and immune regulation.

### The impact of tumor cell metabolic reprogramming on T cells

**Nutrition competition in TME.** In the TME, both tumor cells and immune cells face substantial energy demands. Tumor cells meet their growth requirements while simultaneously suppressing the effector functions of immune cells through intense nutrient competition. Tumors directly disrupt key metabolic pathways in effector immune cells by outcompeting them for critical nutrients. For instance, glucose and oxygen consumption by tumor cells can limit T cell function, leading to reduced mTOR activity, diminished glycolytic capacity and impaired IFN- $\gamma$  production [118,119] (Fig 3).

Competition for amino acids by tumor cells also exacerbates this effect. In lung squamous cell carcinoma, tumor cells deplete methionine, an essential precursor required for T cell activation, ultimately reducing T cell cytotoxicity and increasing the proportion of exhausted T cells [120]. In breast cancer, elevated glutamine uptake by tumor cells inhibits

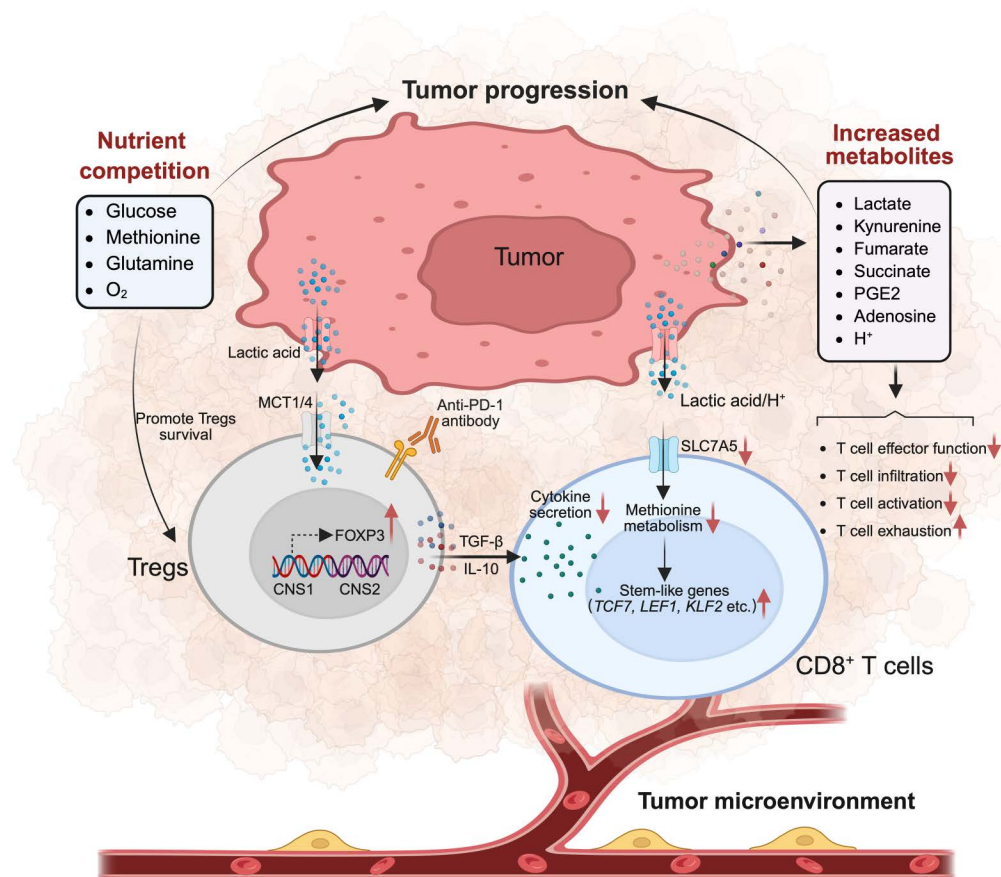

**Fig 3. Metabolic interplay of cancer cells and T cells in the TME.** The tumor microenvironment (TME) is enriched with immunosuppressive cell populations such as regulatory T cells (Tregs), which promote tumor progression and suppress anti-tumor immunity through metabolic reprogramming and the secretion of inhibitory factors, such as TGF- $\beta$  and IL-10. Tumor cells further contribute to immune dysfunction by outcompeting effector T cells for critical nutrients, including oxygen, glucose and amino acids, thereby impairing T cell infiltration, effector function and cytotoxicity. Moreover, the accumulation of tumor-derived metabolites such as lactate, which suppresses T cell proliferation and function, yet may support T cell stemness, profoundly reshapes the immune landscape. Additional metabolites, including kynurenine, fumarate and succinate, further contribute to CD8<sup>+</sup> T cell dysfunction and exhaustion. Collectively, these factors establish a metabolically hostile and immunosuppressive milieu that impairs effective antitumor immune responses. MCT, monocarboxylate transporter; PD-1, programmed cell death protein 1; PGE2, prostaglandin E2. Figure created with BioRender, <https://www.biorender.com>.

<https://doi.org/10.1371/journal.pbio.3003284.g003>

T cell-mediated cytotoxicity [121]. In cervical cancer, tumor cells deplete serine from the TME via serine incorporator 2 expression, leading to T cell exhaustion, reduced effector function, and cell death [122]. These nutrient-driven competitions exclude T cells from tumor tissues, limiting their infiltration, function and tumor-killing capabilities.

**Tumor-secreted metabolites foster a suppressive TME.** The TME is rich in metabolic byproducts secreted by tumor cells, which have a profound impact on T cell function (Fig 3). Lactic acid, a major byproduct of aerobic glycolysis in tumor cells, impairs T cell proliferation and cytokine production. Lactic acid consists of lactate and hydrogen ions, which lower the pH of the surrounding environment. Recent studies have demonstrated that short-term exposure to low pH inhibits T cell infiltration by downregulating integrin  $\beta$ 1 expression via suppression of the METTL3–N6-methyladenosine (m6A) axis [7, 15]. However, prolonged exposure to low pH can induce a transition of T cells toward a stem-like phenotype by altering methionine metabolism, ultimately enhancing T cell immune responses [123]. This finding may explain the presence of TCF-1<sup>+</sup> stem-like T cells, critical immune checkpoint responders, both in tumors and draining lymph nodes. Lactate

also plays a crucial role in T cell differentiation. Studies have shown that adding high-concentration sodium lactate to *in vitro* cultures promotes stem-like differentiation of T cells by inducing H3K27 acetylation at the *TCF7* locus [124]. These findings suggest that lactate and hydrogen ions influence T cell differentiation and function through distinct mechanisms. The effects of lactic acid on T cells are highly context-dependent, with its availability and environmental conditions influencing T cell fate. For instance, in the presence of repeated tumor antigen stimulation, lactic acid promotes T cell exhaustion. Conversely, prolonged exposure to lactate without antigen stimulation drives T cell stem-like differentiation.

In addition to lactic acid, other tumor-derived metabolites profoundly influence T cell immunity. Kynurenine, a key product of tumor-associated tryptophan metabolism, is absorbed by T cells and promotes T cell exhaustion [125,126]. Another immunosuppressive factor, fibroblast growth factor 21, sustains hyperactivation of the AKT–mTORC1–SREBP1 signaling axis in activated CD8<sup>+</sup> T cells, leading to enhanced cholesterol biosynthesis and T cell exhaustion [127]. Prostaglandin E2, an unsaturated fatty acid secreted by tumor cells, suppresses T cell responses both indirectly by modulating inflammatory monocytes and directly by reducing T cell sensitivity to IL-2, thereby impairing their anti-tumor activity [128–130]. Notably, tumor-derived fumarate accumulates in the TME and covalently modifies ZAP70 through succination, further disrupting TCR signaling and impairing T cell activation [131]. These findings illustrate the intricate ways in which tumor-derived metabolites subvert T cell immunity. Targeting these metabolic pathways holds great promise for counteracting immune suppression and enhancing antitumor responses.

### The impact of T cell metabolic reprogramming on tumor progression

T cell metabolic reprogramming not only governs T cell differentiation and function, but also profoundly influences tumor progression by reshaping the metabolic and immunologic landscape of the TME [132–135].

Tregs predominantly depend on OXPHOS and FAO, enabling them to survive and maintain immunosuppressive function in the nutrient-poor, hypoxic TME, thereby facilitating tumor growth by limiting cytotoxic T lymphocyte activity and promoting immune evasion [108,136]. Moreover, Tregs intensify metabolic competition by consuming essential nutrients such as glucose, further impairing effector T cell function. Notably, intra-tumoral Tregs can up-regulate glycolytic pathways that allow them to utilize lactic acid as an alternative energy source, thereby supporting their proliferation and suppressive function [26]. In addition, Tregs secrete immunosuppressive molecules such as adenosine and IL-10, directly contributing to tumor progression [134,137–139].

TH17 cells play a dual role in tumor immunity. On one hand, TH17-derived cytokines, such as IL-17A and GM-CSF, can enhance anti-tumor immunity by activating dendritic cells and recruiting CD8<sup>+</sup> T cells [140–142]. On the other hand, under certain metabolic or pro-inflammatory conditions, TH17 cells can produce the cytokine TWEAK, which interacts with its receptor Fn14 to drive EMT, migration and invasion [143]. Furthermore, chronic exposure to IL-17A may promote angiogenesis, EMT and proliferation in inflammation-driven tumors [144–147]. Intriguingly, the functional plasticity of TH17 cells is closely linked to their metabolic state. Inhibiting IRF4-driven glycolysis or modulating glutaminolysis can reprogram TH17 cell cytokine profiles, reducing their pro-tumorigenic effects while enhancing immune-stimulatory phenotypes [115]. This metabolic plasticity offers opportunities to selectively preserve the beneficial properties of TH17 cells while mitigating their tumor-promoting potential. In summary, the metabolic programming of Tregs and TH17 cells reshapes tumor progression. Targeting their metabolic dependencies, either by disrupting Treg fitness or reprogramming TH17 cell metabolism, offers a promising strategy to remodel the tumor ecosystem to enhance anti-tumor immunity.

### Applications of metabolic reprogramming in cancer therapy

Targeting the altered metabolic states of both tumor cells and T cells has emerged as a promising strategy in cancer therapy. By modulating key metabolic pathways, such as glycolysis, glutamine metabolism and FAO, researchers aim to overcome tumor resistance and enhance the effectiveness of immunotherapies. Exploiting the metabolic dependencies of cancer cells opens new avenues for treatment, while reprogramming T cell metabolism can improve their functionality

and longevity. This section highlights current applications and emerging directions in metabolic interventions for cancer therapy.

### Leveraging metabolic dependencies of cancer cells to enhance treatment efficacy

Targeting metabolic pathways such as glycolysis, FAO and glutamine metabolism has emerged as a promising cancer treatment strategy. Several small-molecule inhibitors, including GLUT inhibitors (e.g., fasentin, WZB117) and nicotinamide phosphoribosyltransferase inhibitors (e.g., GMX1778, STF-31), impair tumor cell proliferation by disrupting glucose uptake and energy production [148,149]. Other compounds targeting key glycolytic enzymes (such as 2-deoxyglucose and 3-bromopyruvate, which are HK2 inhibitors, and PKM2-IN-1, a PKM2 inhibitor) have shown anti-tumor effects in preclinical models [150]. Notably, some regulators that alter these glycolytic enzymes have the potential to be developed into pharmaceuticals. For instance, protein phosphatase 4 regulator subunit 1 upregulates tumor glycolysis through strengthening the interaction between ERK1/2 and PKM2, promoting the growth and metastasis of gallbladder cancer [151]. The epigenetic modification enzyme METTL3 up-regulate the expression of HK2 through m6A modification in mRNA, enhances glycolysis in pancreatic ductal adenocarcinoma cells and promotes invasion [152]. However, due to the widespread expression of these metabolic enzymes in normal proliferating cells, therapeutic application is limited by toxicity. Moreover, treatments such as programmed death ligand 1 (PD-L1) blockade can indirectly suppress tumor glycolysis via mTOR inhibition, highlighting the complex interplay between metabolism and immune regulation [118].

Beyond glycolysis, tumors can utilize OXPHOS for ATP generation. Mitochondrial complex I, the entry point of the electron transport chain, not only drives bioenergetic flux but also regulates ROS, supports immune evasion and promotes metastasis, making it a promising metabolic target for cancer therapy [153–155]. Metformin, a widely prescribed anti-diabetic drug, exerts a mild inhibitory effect on mitochondrial complex I. Epidemiological studies have linked metformin use to improved cancer outcomes, yet clinical benefits appear limited to subsets of patients (e.g., those with HER2<sup>+</sup> breast cancer), likely reflecting inter-tumor metabolic heterogeneity. Moreover, IACS-010759, a more potent and selective mitochondrial complex I inhibitor, has shown promising anti-tumor activity but was associated with significant adverse events in early trials [156–159]. Therefore, additional clinical studies are required to fully assess both the efficacy and safety of targeting mitochondrial complex I.

Recent studies have revealed that targeting glucose metabolism alone may be insufficient for durable cancer control, as tumor cells can adapt by reprogramming their metabolism to rely on fatty acids and amino acids for ATP production. Consequently, interventions targeting lipid and amino acid metabolism have gained attention as complementary therapeutic strategies. For instance, etomoxir, an inhibitor of mitochondrial FAO, suppresses tumor growth and reduces CD47-mediated immune evasion in glioblastoma multiforme [160]. Similarly, the glutamine transporter inhibitor V-9302 selectively blocks glutamine uptake in TNBC cells, thereby impairing cancer cell proliferation [121]. In addition, enzymes involved in amino acid catabolism, such as indoleamine 2,3-dioxygenase (IDO) in the kynurenine pathway, play critical roles in tumor-associated immunosuppression by depleting tryptophan and accumulating immunosuppressive metabolites. While preclinical studies suggested that IDO inhibition could enhance the efficacy of immune checkpoint therapies such as anti-PD-L1, clinical translation has proven challenging. Notably, the IDO1 inhibitor epacadostat failed to demonstrate clinical benefit in a phase III trial when combined with immune checkpoint blockade in patients with unresectable or metastatic melanoma [139,161–163]. These findings underscore the metabolic adaptability of tumors and highlight the necessity for thorough preclinical characterization and clinical validation when advancing metabolic targets toward therapeutic applications.

Although advances in cancer metabolism research are encouraging, many questions remain. Ideal metabolic therapies should selectively target tumors without harming normal or immune cells. To address undruggable targets, technologies such as proteolysis targeting chimeras (known as PROTACs) offer promise by degrading proteins via E3 ubiquitin ligase recruitment. For example, ARV-110, which targets the androgen receptor, has shown efficacy in phase II trials [164].

However, the limited availability of suitable E3 ligases presents a technical barrier. Thus, continued exploration of tumor metabolic networks and innovative therapeutic platforms is essential to translate these insights into effective and precise cancer treatments.

### Leveraging T cell metabolic programming for enhanced cancer immunotherapy

Adoptive T cell therapy, encompassing strategies such as chimeric antigen receptor T (CAR-T) cell, T cell receptor-engineered T cell and TIL therapies, has emerged as a promising modality for cancer treatment. However, the metabolic challenges imposed by the TME often undermine the persistence and effector functions of these adoptively transferred cells. Consequently, metabolic reprogramming is being actively explored as a means to enhance the therapeutic efficacy of adoptive cell therapy.

**CAR-T cell metabolism and costimulatory domains.** CAR-T cell therapy involves genetically modifying T cells to express chimeric antigen receptors that enable precise tumor recognition and elimination. Critically, the intracellular signaling domains of CAR constructs directly influence the metabolic program of these engineered cells. For example, CD28 costimulatory signaling enhances glycolysis, which supports rapid effector functions, whereas 4-1BB signaling promotes mitochondrial biogenesis and helps maintain oxidative metabolism, thereby contributing to prolonged cell persistence [164,165]. The most effective CAR constructs often incorporate both CD28 and 4-1BB domains, creating a metabolic balance that fosters both immediate effector responses and long-term survival. Emerging strategies have also examined the inclusion of additional costimulatory molecules. One recent study demonstrated that incorporating the B cell costimulatory molecules CD79A and CD40 into CAR-T cells not only enhances glycolytic activity but also markedly improves anti-tumor responses [166]. Nevertheless, the selection of optimal costimulatory combinations is complex; rather than simply adding signals, the goal is to maximally remodel T cell metabolism in a synergistic manner, a challenge that requires further experimental validation and design refinement.

**Genome editing and engineering to modulate T cell metabolism.** Genome editing tools are being leveraged to directly target metabolic pathways in T cells. For instance, complete knockout of meteorin-like, a cytokine secreted in the TME that disrupts CD8<sup>+</sup> T cell metabolism by promoting mitochondrial dysfunction, enhances metabolic fitness and improves tumor control [167]. Similarly, adenosine, a potent immunosuppressive metabolite that acts via the A2A receptor (A2AR), limits T cell activity. A2AR deletion or engineered overexpression of adenosine deaminase, which converts adenosine into inosine, effectively overcomes adenosine-induced immunosuppression in CAR-T cells, thereby enhancing cytokine production and anti-tumor activity [168–170]. Additionally, given the role of O-GlcNAc transferase in sustaining T cell “stemness” through mannose-mediated signaling [171], engineering T cells to express higher level of O-GlcNAc transferase represents another promising strategy.

**Ex vivo metabolic preconditioning of therapeutic T cells.** One of the major hurdles in adoptive cell therapy is preventing ex vivo expanded T cells from terminally differentiating into short-lived effector cells. Instead, maintaining a “stem-like” state is crucial for persistent anti-tumor function after infusion. The ex vivo expansion phase provides an ideal window for metabolic intervention. Supplementing culture media with specific metabolites or cytokines can favorably modulate T cell metabolic profiles. For example, IL-15 enhances OXPHOS and FAO, thereby supporting long-term T cell survival [172], while IL-7 can promote a balanced increase in both glycolysis and OXPHOS [173].

Recent studies have also explored the addition of lactic acid or lactate salts to culture conditions. Although the effects of lactate on T cells remain a subject of debate, its incorporation has been observed to enhance the “stemness” of CAR-T cells, ultimately boosting their anti-tumor efficacy [123,124]. A recent study has shown that D-mannose, a cost-effective monosaccharide, more effectively promotes a stem-like phenotype than conventional IL-15 treatment, while also supporting cell expansion for up to several months. D-mannose significantly increased TCF1 expression, promoted T cell differentiation toward a less differentiated state and enhanced anti-tumor activity, leading to prolonged survival in preclinical models [171]. The ability of D-mannose to support long-term culture and maintenance of T cell states holds great promise for both the expansion of TILs and the generation of standardized, universal CAR-T cell products.

**Combined metabolic and checkpoint blockade strategies.** In addition to restoring intrinsic T cell activity, immune checkpoint blockade therapies also exert metabolic regulatory effects. For instance, PD-1 blockade can reprogram T cell metabolism by downregulating glycolysis while enhancing FAO, thereby improving cell persistence [174]. Combining immune checkpoint blockade with metabolic interventions may, therefore, produce synergistic benefits. For example, metformin reprograms tryptophan metabolism, stimulating CD8<sup>+</sup> T cell cytotoxicity; its combination with anti-PD-1 therapy enhances CD8<sup>+</sup> T cell proliferation and IFN- $\gamma$  production [175,176]. Similarly, the antifolate agent pemetrexed can induce immunogenic cell death, increase cytotoxic T cell infiltration, and augment the anti-tumor effects of PD-1 blockade [177,178]. A recent study has shown that D-mannose enhances the effectiveness of immunotherapy and radiotherapy in TNBC by promoting the degradation of PD-L1 [179]. This dual function, which both inhibits tumor growth and boosts T cell activity, positions D-mannose as a highly promising therapeutic agent.

While these metabolic interventions offer numerous promising avenues to bolster adoptive T cell therapy, future research must focus on optimizing the combination and timing of these strategies. A key objective is to maximize T cell persistence and function while mitigating the immunosuppressive challenges of the TME. In parallel, reducing the cost and complexity of metabolic interventions will be essential for their translation into clinical practice. As our understanding of metabolic networks deepens, particularly through high-resolution metabolic profiling and genetic screening, new targets and combinatorial approaches will likely emerge, further advancing the field of cancer immunotherapy.

## Conclusion

The complex metabolic interactions between cancer cells and T cells within the TME critically influence immune function and tumor progression through mechanisms such as nutrient competition and metabolic reprogramming [7,30,93,129]. The outcomes of these processes are governed not only by nutrient availability but also by intrinsic biochemical and biophysical properties of each cell type, such as transporter affinity [180,181], metabolic flexibility and adaptability to immunosuppressive niches [17,182–184], ultimately resulting in an imbalanced metabolic partitioning. Targeting key metabolic pathways, including aerobic glycolysis, glutamine metabolism and fatty acid metabolism, can disrupt tumor immune evasion [185,186], induce cancer cell apoptosis [37,187] and enhance sensitivity to immunotherapies [188–190], highlighting the promising potential of metabolic interventions. Combining metabolic inhibition with immunotherapy, such as modulating T cell metabolism and reprogramming immunosuppressive cells, offers an effective strategy to restore tumor-fighting immune responses, suppress tumor-supportive cells and foster a more favorable anti-tumor environment. However, the high metabolic plasticity of tumor cells enables them to outcompete other cells for nutrients and actively reshape the TME to their advantage. This not only suppresses the activity of cytotoxic CD8<sup>+</sup> T cells but also promotes the accumulation of exhausted CD8<sup>+</sup> T cells and immunosuppressive Tregs. In addition, tumor cells actively secrete immunosuppressive cytokines such as TGF- $\beta$ , which directly inhibit T cell effector functions. Furthermore, lactate is not merely a passive consequence of metabolic overflow; its accumulation contributes to an immunosuppressive milieu and may actively impair T cell function and viability [191–194].

Despite significant advances in our understanding of how tumor cells and T cells rewire their metabolism, translating these insights into effective therapies remains challenging. The TME comprises heterogeneous tumor subclones and diverse T cell subsets, each with unique metabolic dependencies, complicating the identification of optimal therapeutic targets. Moreover, many metabolic inhibitors designed to starve cancer cells simultaneously impair effector T cells that rely on similar pathways, thereby compromising immune function [195,196]. Metabolic profiles also vary widely across tumor types and disease stages, limiting the broad applicability of single-agent interventions.

To overcome these obstacles, several key strategies are required. For example, high-resolution techniques, such as single-cell and spatial metabolomics, should be employed to generate comprehensive metabolic maps of all cellular constituents within tumors, thereby identifying unique metabolic vulnerabilities. In addition, therapeutic delivery systems, optimized in terms of dosing, timing and vehicle design, are needed to target metabolic inhibitors specifically to tumor cells

or immunosuppressive subsets (e.g., Tregs), while sparing effector T cells. Furthermore, rational combination regimens that integrate metabolic modulators with immune checkpoint inhibitors or adoptive cell therapies should be developed to synergistically enhance anti-tumor responses. By implementing these approaches, it may be possible to achieve precision metabolic interventions that both suppress tumor growth and preserve or even boost host immune function, ultimately improving clinical outcomes.

## Author contributions

**Conceptualization:** Guideng Li, Hongcheng Cheng.

**Funding acquisition:** Guideng Li, Hongcheng Cheng.

**Supervision:** Guideng Li, Hongcheng Cheng.

**Visualization:** Yajing Qiu, Congcong Zhao.

**Writing – original draft:** Yajing Qiu, Yihan Xu, Xinyuan Ding.

**Writing – review & editing:** Guideng Li, Yajing Qiu, Yihan Xu, Hongcheng Cheng.

## References

1. Xia L, Oyang L, Lin J, Tan S, Han Y, Wu N, et al. The cancer metabolic reprogramming and immune response. *Mol Cancer*. 2021;20(1):28. <https://doi.org/10.1186/s12943-021-01316-8> PMID: 33546704
2. Huang J, Zhang L, Wan D, Zhou L, Zheng S, Lin S, et al. Extracellular matrix and its therapeutic potential for cancer treatment. *Signal Transduct Target Ther*. 2021;6(1):153. <https://doi.org/10.1038/s41392-021-00544-0> PMID: 33888679
3. Li Z, Sun C, Qin Z. Metabolic reprogramming of cancer-associated fibroblasts and its effect on cancer cell reprogramming. *Theranostics*. 2021;11(17):8322–36. <https://doi.org/10.7150/thno.62378> PMID: 34373744
4. Arner EN, Rathmell JC. Metabolic programming and immune suppression in the tumor microenvironment. *Cancer Cell*. 2023;41(3):421–33. <https://doi.org/10.1016/j.ccell.2023.01.009> PMID: 36801000
5. Boedtker E, Pedersen SF. The acidic tumor microenvironment as a driver of cancer. *Annu Rev Physiol*. 2020;82:103–26. <https://doi.org/10.1146/annurev-physiol-021119-034627> PMID: 31730395
6. Wang JX, Choi SYC, Niu X, Kang N, Xue H, Killam J, et al. Lactic acid and an acidic tumor microenvironment suppress anticancer immunity. *Int J Mol Sci*. 2020;21(21):8363. <https://doi.org/10.3390/ijms21218363> PMID: 33171818
7. Quinn WJ 3rd, Jiao J, TeSlaa T, Stadanlick J, Wang Z, Wang L, et al. Lactate limits T cell proliferation via the NAD(H) redox state. *Cell Rep*. 2020;33(11):108500. <https://doi.org/10.1016/j.celrep.2020.108500> PMID: 33326785
8. Liu Y, Wang F, Peng D, Zhang D, Liu L, Wei J, et al. Activation and antitumor immunity of CD8<sup>+</sup> T cells are supported by the glucose transporter GLUT10 and disrupted by lactic acid. *Sci Transl Med*. 2024;16(762):eadk7399. <https://doi.org/10.1126/scitranslmed.adk7399> PMID: 39196962
9. Peralta RM, Xie B, Lontos K, Nieves-Rosado H, Spahr K, Joshi S, et al. Dysfunction of exhausted T cells is enforced by MCT11-mediated lactate metabolism. *Nat Immunol*. 2024;25(12):2297–307. <https://doi.org/10.1038/s41590-024-01999-3> PMID: 39516648
10. Wang Y, Xu M, Sun J, Li X, Shi H, Wang X, et al. Glycolytic neutrophils accrued in the spleen compromise anti-tumour T cell immunity in breast cancer. *Nat Metab*. 2023;5(8):1408–22. <https://doi.org/10.1038/s42255-023-00853-4> PMID: 37563468
11. Bian Y, Li W, Kremer DM, Sajjakulnukit P, Li S, Crespo J, et al. Cancer SLC43A2 alters T cell methionine metabolism and histone methylation. *Nature*. 2020;585(7824):277–82. <https://doi.org/10.1038/s41586-020-2682-1> PMID: 32879489
12. Zhu L, Zhu X, Wu Y. Effects of glucose metabolism, lipid metabolism, and glutamine metabolism on tumor microenvironment and clinical implications. *Biomolecules*. 2022;12(4).
13. Guo C, You Z, Shi H, Sun Y, Du X, Palacios G, et al. SLC38A2 and glutamine signalling in cDC1s dictate anti-tumour immunity. *Nature*. 2023;620(7972):200–8. <https://doi.org/10.1038/s41586-023-06299-8> PMID: 37407815
14. Apostolova P, Pearce EL. Lactic acid and lactate: revisiting the physiological roles in the tumor microenvironment. *Trends Immunol*. 2022;43(12):969–77. <https://doi.org/10.1016/j.it.2022.10.005> PMID: 36319537
15. Brand A, Singer K, Koehl GE, Kolitzus M, Schoenhammer G, Thiel A, et al. LDHA-associated lactic acid production blunts tumor immunosurveillance by T and NK cells. *Cell Metab*. 2016;24(5):657–71. <https://doi.org/10.1016/j.cmet.2016.08.011> PMID: 27641098
16. Wang Z, Shang J, Qiu Y, Cheng H, Tao M, Xie E, et al. Suppression of the METTL3-m6A-integrin  $\beta$ 1 axis by extracellular acidification impairs T cell infiltration and antitumor activity. *Cell Rep*. 2024;43(2):113796. <https://doi.org/10.1016/j.celrep.2024.113796> PMID: 38367240
17. Groneberg M, Hoenow S, Marggraaf C, Fehling H, Metwally NG, Hansen C, et al. HIF-1 $\alpha$  modulates sex-specific Th17/Treg responses during hepatic amoebiasis. *J Hepatol*. 2022;76(1):160–73. <https://doi.org/10.1016/j.jhep.2021.09.020> PMID: 34599999

18. Jarvis LB, Rainbow DB, Coppard V, Howlett SK, Georgieva Z, Davies JL, et al. Therapeutically expanded human regulatory T-cells are super-suppressive due to HIF1A induced expression of CD73. *Commun Biol.* 2021;4(1):1186. <https://doi.org/10.1038/s42003-021-02721-x> PMID: [34650224](https://pubmed.ncbi.nlm.nih.gov/34650224/)
19. Kumagai S, et al. Lactic acid promotes PD-1 expression in regulatory T cells in highly glycolytic tumor microenvironments. *Cancer Cell.* 2022;40(2):201-218.e9.
20. Liu Y, Wang F, Peng D, Zhang D, Liu L, Wei J, et al. Activation and antitumor immunity of CD8<sup>+</sup> T cells are supported by the glucose transporter GLUT10 and disrupted by lactic acid. *Sci Transl Med.* 2024;16(762):eade7399. <https://doi.org/10.1126/scitranslmed.adk7399> PMID: [39196962](https://pubmed.ncbi.nlm.nih.gov/39196962/)
21. Ma J, Tang L, Tan Y, Xiao J, Wei K, Zhang X, et al. Lithium carbonate revitalizes tumor-reactive CD8<sup>+</sup> T cells by shunting lactic acid into mitochondria. *Nat Immunol.* 2024;25(3):552–61. <https://doi.org/10.1038/s41590-023-01738-0> PMID: [38263463](https://pubmed.ncbi.nlm.nih.gov/38263463/)
22. Ma X, et al., CD36-mediated ferroptosis dampens intratumoral CD8<sup>+</sup> T cell effector function and impairs their antitumor ability. *Cell Metab.* 2021. 33(5): p. 1001–12.e5.
23. Wang R, Liu Z, Fan Z, Zhan H. Lipid metabolism reprogramming of CD8<sup>+</sup> T cell and therapeutic implications in cancer. *Cancer Lett.* 2023;567:216267. <https://doi.org/10.1016/j.canlet.2023.216267> PMID: [37315709](https://pubmed.ncbi.nlm.nih.gov/37315709/)
24. Cheng J, et al. Cancer-cell-derived fumarate suppresses the anti-tumor capacity of CD8<sup>+</sup> T cells in the tumor microenvironment. *Cell Metab.* 2023;35(6):961–78.e10.
25. You S, Li S, Zeng L, Song J, Li Z, Li W, et al. Lymphatic-localized Treg-mregDC crosstalk limits antigen trafficking and restrains anti-tumor immunity. *Cancer Cell.* 2024;42(8):1415-1433.e12. <https://doi.org/10.1016/j.ccell.2024.06.014> PMID: [39029466](https://pubmed.ncbi.nlm.nih.gov/39029466/)
26. Watson MJ, Vignali PDA, Mullett SJ, Overacre-Delgoffe AE, Peralta RM, Grebinoski S, et al. Metabolic support of tumour-infiltrating regulatory T cells by lactic acid. *Nature.* 2021;591(7851):645–51. <https://doi.org/10.1038/s41586-020-03045-2> PMID: [33589820](https://pubmed.ncbi.nlm.nih.gov/33589820/)
27. Liu C, Chikina M, Deshpande R, Menk AV, Wang T, Tabib T, et al. Treg cells promote the SREBP1-dependent metabolic fitness of tumor-promoting macrophages via repression of CD8<sup>+</sup> T cell-derived interferon- $\gamma$ . *Immunity.* 2019;51(2):381-397.e6. <https://doi.org/10.1016/j.immuni.2019.06.017> PMID: [31350177](https://pubmed.ncbi.nlm.nih.gov/31350177/)
28. Ping Y, Shan J, Liu Y, Liu F, Wang L, Liu Z, et al. Taurine enhances the antitumor efficacy of PD-1 antibody by boosting CD8<sup>+</sup> T cell function. *Cancer Immunol Immunother.* 2023;72(4):1015–27. <https://doi.org/10.1007/s00262-022-03308-z> PMID: [36261540](https://pubmed.ncbi.nlm.nih.gov/36261540/)
29. Miller KD, O'Connor S, Pniewski KA, Kannan T, Acosta R, Mirji G, et al. Acetate acts as a metabolic immunomodulator by bolstering T-cell effector function and potentiating antitumor immunity in breast cancer. *Nat Cancer.* 2023;4(10):1491–507. <https://doi.org/10.1038/s43018-023-00636-6> PMID: [37723305](https://pubmed.ncbi.nlm.nih.gov/37723305/)
30. Cao T, et al. Cancer SLC6A6-mediated taurine uptake transactivates immune checkpoint genes and induces exhaustion in CD8<sup>+</sup> T cells. *Cell.* 2024;187(9).
31. Hu X, Ma Z, Xu B, Li S, Yao Z, Liang B, et al. Glutamine metabolic microenvironment drives M2 macrophage polarization to mediate trastuzumab resistance in HER2-positive gastric cancer. *Cancer Commun (Lond).* 2023;43(8):909–37. <https://doi.org/10.1002/cac2.12459> PMID: [37434399](https://pubmed.ncbi.nlm.nih.gov/37434399/)
32. Tong Y, Guo D, Lin S-H, Liang J, Yang D, Ma C, et al. SUCLA2-coupled regulation of GLS succinylation and activity counteracts oxidative stress in tumor cells. *Mol Cell.* 2021;81(11):2303–16.e8. <https://doi.org/10.1016/j.molcel.2021.04.002> PMID: [33991485](https://pubmed.ncbi.nlm.nih.gov/33991485/)
33. Tao J, Yang G, Zhou W, Qiu J, Chen G, Luo W, et al. Targeting hypoxic tumor microenvironment in pancreatic cancer. *J Hematol Oncol.* 2021;14(1):14. <https://doi.org/10.1186/s13045-020-01030-w> PMID: [33436044](https://pubmed.ncbi.nlm.nih.gov/33436044/)
34. Paredes F, Williams HC, San Martin A. Metabolic adaptation in hypoxia and cancer. *Cancer Lett.* 2021;502:133–42.
35. Katopodi T, et al. Tumor cell metabolic reprogramming and hypoxic immunosuppression: driving carcinogenesis to metastatic colonization. *Front Immunol.* 2023;14:1325360.
36. Hu N, Li H, Tao C, Xiao T, Rong W. The role of metabolic reprogramming in the tumor immune microenvironment: mechanisms and opportunities for immunotherapy in hepatocellular carcinoma. *Int J Mol Sci.* 2024;25(11):5584. <https://doi.org/10.3390/ijms25115584> PMID: [38891772](https://pubmed.ncbi.nlm.nih.gov/38891772/)
37. Liao P, et al. CD8<sup>+</sup> T cells and fatty acids orchestrate tumor ferroptosis and immunity via ACSL4. *Cancer Cell.* 2022;40(4):365–78.e6.
38. Lin H, Tison K, Du Y, Kirchoff P, Kim C, Wang W, et al. Itaconate transporter SLC13A3 impairs tumor immunity via endowing ferroptosis resistance. *Cancer Cell.* 2024;42(12):2032-2044.e6. <https://doi.org/10.1016/j.ccell.2024.10.010> PMID: [39515327](https://pubmed.ncbi.nlm.nih.gov/39515327/)
39. Yuan S, Sun R, Shi H, Chapman NM, Hu H, Guy C, et al. VDAC2 loss elicits tumour destruction and inflammation for cancer therapy. *Nature.* 2025;640(8060):1062–71. <https://doi.org/10.1038/s41586-025-08732-6> PMID: [40108474](https://pubmed.ncbi.nlm.nih.gov/40108474/)
40. Jiao D, Cai Z, Choksi S, Ma D, Choe M, Kwon H-J, et al. Necroptosis of tumor cells leads to tumor necrosis and promotes tumor metastasis. *Cell Res.* 2018;28(8):868–70. <https://doi.org/10.1038/s41422-018-0058-y> PMID: [29941926](https://pubmed.ncbi.nlm.nih.gov/29941926/)
41. Paul S, Ghosh S, Kumar S. Tumor glycolysis, an essential sweet tooth of tumor cells. *Semin Cancer Biol.* 2022;86(Pt 3):1216–30. <https://doi.org/10.1016/j.semcancer.2022.09.007> PMID: [36330953](https://pubmed.ncbi.nlm.nih.gov/36330953/)
42. Recouvreur MV, Grenier SF, Zhang Y, Esparza E, Lambies G, Galapate CM, et al. Glutamine mimicry suppresses tumor progression through asparagine metabolism in pancreatic ductal adenocarcinoma. *Nat Cancer.* 2024;5(1):100–13. <https://doi.org/10.1038/s43018-023-00649-1> PMID: [37814011](https://pubmed.ncbi.nlm.nih.gov/37814011/)
43. Geng F, Guo D. SREBF1/SREBP-1 concurrently regulates lipid synthesis and lipophagy to maintain lipid homeostasis and tumor growth. *Autophagy.* 2024;20(5):1183–5. <https://doi.org/10.1080/15548627.2023.2275501> PMID: [37927089](https://pubmed.ncbi.nlm.nih.gov/37927089/)

44. Reinfeld BI, Rathmell WK, Kim TK, Rathmell JC. The therapeutic implications of immunosuppressive tumor aerobic glycolysis. *Cell Mol Immunol*. 2022;19(1):46–58. <https://doi.org/10.1038/s41423-021-00727-3> PMID: [34239083](https://pubmed.ncbi.nlm.nih.gov/34239083/)
45. Qiao Q, Hu S, Wang X. The regulatory roles and clinical significance of glycolysis in tumor. *Cancer Commun (Lond)*. 2024;44(7):761–86. <https://doi.org/10.1002/cac2.12549> PMID: [38851859](https://pubmed.ncbi.nlm.nih.gov/38851859/)
46. Shi T, Ma Y, Cao L, Zhan S, Xu Y, Fu F, et al. B7-H3 promotes aerobic glycolysis and chemoresistance in colorectal cancer cells by regulating HK2. *Cell Death Dis*. 2019;10(4):308. <https://doi.org/10.1038/s41419-019-1549-6> PMID: [30952834](https://pubmed.ncbi.nlm.nih.gov/30952834/)
47. Végran F, Boidot R, Michiels C, Sonveaux P, Feron O. Lactate influx through the endothelial cell monocarboxylate transporter MCT1 supports an NF- $\kappa$ B/IL-8 pathway that drives tumor angiogenesis. *Cancer Res*. 2011;71(7):2550–60. <https://doi.org/10.1158/0008-5472.CAN-10-2828> PMID: [21300765](https://pubmed.ncbi.nlm.nih.gov/21300765/)
48. Wang J-Z, et al. The role of the HIF-1 $\alpha$ /ALYREF/PKM2 axis in glycolysis and tumorigenesis of bladder cancer. *Cancer Communications (London, England)*. 2021;41(7):560–75.
49. Chen Z, Hu Z, Sui Q, Huang Y, Zhao M, Li M, et al. LncRNA FAM83A-AS1 facilitates tumor proliferation and the migration via the HIF-1 $\alpha$ /glycolysis axis in lung adenocarcinoma. *Int J Biol Sci*. 2022;18(2):522–35. <https://doi.org/10.7150/ijbs.67556> PMID: [35002507](https://pubmed.ncbi.nlm.nih.gov/35002507/)
50. Qi C-L, Huang M-L, Zou Y, Yang R, Jiang Y, Sheng J-F, et al. The IRF2/CENP-N/AKT signaling axis promotes proliferation, cell cycling and apoptosis resistance in nasopharyngeal carcinoma cells by increasing aerobic glycolysis. *J Exp Clin Cancer Res*. 2021;40(1):390. <https://doi.org/10.1186/s13046-021-02191-3> PMID: [34893086](https://pubmed.ncbi.nlm.nih.gov/34893086/)
51. Ding J-H, Xiao Y, Yang F, Song X-Q, Xu Y, Ding X-H, et al. Guanosine diphosphate-mannose suppresses homologous recombination repair and potentiates antitumor immunity in triple-negative breast cancer. *Sci Transl Med*. 2024;16(728):eadg7740. <https://doi.org/10.1126/scitranslmed.adg7740> PMID: [38170790](https://pubmed.ncbi.nlm.nih.gov/38170790/)
52. Wang L, et al. Fructose-1,6-bisphosphatase 2 inhibits oral squamous cell carcinoma tumorigenesis and glucose metabolism via downregulation of c-Myc. *Oxidative Med Cell Longev*. 2022:6766787.
53. Wang B, Yuan Y, Zou Y, Qi Z, Huang G, Liu Y, et al. Fructose-1,6-bisphosphatase 2 represses cervical cancer progression via inhibiting aerobic glycolysis through promoting pyruvate kinase isozyme type M2 ubiquitination. *Anticancer Drugs*. 2022;33(1):e198–206. <https://doi.org/10.1097/CAD.0000000000001185> PMID: [34387592](https://pubmed.ncbi.nlm.nih.gov/34387592/)
54. Sun L, Song L, Wan Q, Wu G, Li X, Wang Y, et al. cMyc-mediated activation of serine biosynthesis pathway is critical for cancer progression under nutrient deprivation conditions. *Cell Res*. 2015;25(4):429–44. <https://doi.org/10.1038/cr.2015.33> PMID: [25793315](https://pubmed.ncbi.nlm.nih.gov/25793315/)
55. Lin J, Zhang P, Liu W, Liu G, Zhang J, Yan M, et al. A positive feedback loop between ZEB2 and ACSL4 regulates lipid metabolism to promote breast cancer metastasis. *Elife*. 2023;12:RP87510. <https://doi.org/10.7554/eLife.87510> PMID: [38078907](https://pubmed.ncbi.nlm.nih.gov/38078907/)
56. Chen J, Ding C, Chen Y, Hu W, Yu C, Peng C, et al. ACSL4 reprograms fatty acid metabolism in hepatocellular carcinoma via c-Myc/SREBP1 pathway. *Cancer Lett*. 2021;502:154–65. <https://doi.org/10.1016/j.canlet.2020.12.019> PMID: [33340617](https://pubmed.ncbi.nlm.nih.gov/33340617/)
57. Wang C, Chen Z, Yi Y, Ding Y, Xu F, Kang H, et al. RBM45 reprograms lipid metabolism promoting hepatocellular carcinoma via Rictor and ACSL4/ACSL4. *Oncogene*. 2024;43(5):328–40. <https://doi.org/10.1038/s41388-023-02902-4> PMID: [38040804](https://pubmed.ncbi.nlm.nih.gov/38040804/)
58. Wang Y, Hu M, Cao J, Wang F, Han JR, Wu TW, et al. ACSL4 and polyunsaturated lipids support metastatic extravasation and colonization. *Cell*. 2025;188(2):412-429.e27. <https://doi.org/10.1016/j.cell.2024.10.047> PMID: [39591965](https://pubmed.ncbi.nlm.nih.gov/39591965/)
59. Mukha A, Kahya U, Linge A, Chen O, Löck S, Lukiyanchuk V, et al. GLS-driven glutamine catabolism contributes to prostate cancer radiosensitivity by regulating the redox state, stemness and ATG5-mediated autophagy. *Theranostics*. 2021;11(16):7844–68. <https://doi.org/10.7150/thno.58655> PMID: [34335968](https://pubmed.ncbi.nlm.nih.gov/34335968/)
60. Yang W-H, Qiu Y, Stamatatos O, Janowitz T, Lukey MJ. Enhancing the efficacy of glutamine metabolism inhibitors in cancer therapy. *Trends Cancer*. 2021;7(8):790–804. <https://doi.org/10.1016/j.trecan.2021.04.003> PMID: [34020912](https://pubmed.ncbi.nlm.nih.gov/34020912/)
61. Chen L-Y, Wu D-S, Shen Y-A. Fatty acid synthase inhibitor cerulenin hinders liver cancer stem cell properties through FASN/APP axis as novel therapeutic strategies. *J Lipid Res*. 2024;65(11):100660. <https://doi.org/10.1016/j.jlr.2024.100660> PMID: [39332525](https://pubmed.ncbi.nlm.nih.gov/39332525/)
62. Xu L, Zhang Y, Lin Z, Deng X, Ren X, Huang M, et al. FASN-mediated fatty acid biosynthesis remodels immune environment in *Clonorchis sinensis* infection-related intrahepatic cholangiocarcinoma. *J Hepatol*. 2024;81(2):265–77. <https://doi.org/10.1016/j.jhep.2024.03.016> PMID: [38508240](https://pubmed.ncbi.nlm.nih.gov/38508240/)
63. Sun L, Li Z, Hu C, Ding J, Zhou Q, Pang G, et al. Age-dependent changes in the gut microbiota and serum metabolome correlate with renal function and human aging. *Aging Cell*. 2023;22(12):e14028. <https://doi.org/10.1111/acer.14028> PMID: [38015106](https://pubmed.ncbi.nlm.nih.gov/38015106/)
64. Alobaidi B, et al. Targeting the monocarboxylate transporter MCT2 and lactate dehydrogenase A LDHA in cancer cells with FX-11 and AR-C155858 inhibitors. *Euro Rev Med Pharmacol Sci*. 2023;27(14):6605–17.
65. Zhang L, Romero P. Metabolic control of CD8<sup>+</sup> T cell fate decisions and antitumor immunity. *Trends Mol Med*. 2018;24(1):30–48. <https://doi.org/10.1016/j.molmed.2017.11.005> PMID: [29246759](https://pubmed.ncbi.nlm.nih.gov/29246759/)
66. Wang R, Green DR. Metabolic reprogramming and metabolic dependency in T cells. *Immunol Rev*. 2012;249(1):14–26. <https://doi.org/10.1111/j.1600-065X.2012.01155.x> PMID: [22889212](https://pubmed.ncbi.nlm.nih.gov/22889212/)
67. Ma S, Ming Y, Wu J, Cui G. Cellular metabolism regulates the differentiation and function of T-cell subsets. *Cell Mol Immunol*. 2024;21(5):419–35. <https://doi.org/10.1038/s41423-024-01148-8> PMID: [38565887](https://pubmed.ncbi.nlm.nih.gov/38565887/)

68. Guerrero JA, Klysz DD, Chen Y, Malipatlolla M, Lone J, Fowler C, et al. GLUT1 overexpression in CAR-T cells induces metabolic reprogramming and enhances potency. *Nat Commun.* 2024;15(1):8658. <https://doi.org/10.1038/s41467-024-52666-y> PMID: [39370422](https://pubmed.ncbi.nlm.nih.gov/39370422/)
69. Kang JA, et al. PKC $\theta$ -mediated PDK1 phosphorylation enhances T cell activation by increasing PDK1 stability. *Mol Cells.* 2017;40(1):37–44.
70. Menk AV, et al. Early TCR signaling induces rapid aerobic glycolysis enabling distinct acute T cell effector functions. *Cell Rep.* 2018;22(6):1509–21.
71. Zhang H, et al. CD28 signaling controls metabolic fitness of pathogenic T cells in medium and large vessel vasculitis. *J Am Coll Cardiol.* 2019;73(14):1811–23.
72. Wang R, Dillon CP, Shi LZ, Milasta S, Carter R, Finkelstein D, et al. The transcription factor Myc controls metabolic reprogramming upon T lymphocyte activation. *Immunity.* 2011;35(6):871–82. <https://doi.org/10.1016/j.immuni.2011.09.021> PMID: [22195744](https://pubmed.ncbi.nlm.nih.gov/22195744/)
73. Sugiura A, Rathmell JC. Metabolic barriers to T cell function in tumors. *J Immunol.* 2018;200(2):400–7. <https://doi.org/10.4049/jimmunol.1701041> PMID: [29311381](https://pubmed.ncbi.nlm.nih.gov/29311381/)
74. Tang X, Mao X, Ling P, Yu M, Pan H, Wang J, et al. Glycolysis inhibition induces anti-tumor central memory CD8<sup>+</sup> T cell differentiation upon combination with microwave ablation therapy. *Nat Commun.* 2024;15(1):4665. <https://doi.org/10.1038/s41467-024-49059-6> PMID: [38821965](https://pubmed.ncbi.nlm.nih.gov/38821965/)
75. Cao J, Liao S, Zeng F, Liao Q, Luo G, Zhou Y. Effects of altered glycolysis levels on CD8<sup>+</sup> T cell activation and function. *Cell Death Dis.* 2023;14(7):407. <https://doi.org/10.1038/s41419-023-05937-3> PMID: [37422501](https://pubmed.ncbi.nlm.nih.gov/37422501/)
76. He J, Shangguan X, Zhou W, Cao Y, Zheng Q, Tu J, et al. Glucose limitation activates AMPK coupled SENP1-Sirt3 signalling in mitochondria for T cell memory development. *Nat Commun.* 2021;12(1):4371. <https://doi.org/10.1038/s41467-021-24619-2> PMID: [34272364](https://pubmed.ncbi.nlm.nih.gov/34272364/)
77. Sukumar M, Liu J, Ji Y, Subramanian M, Crompton JG, Yu Z, et al. Inhibiting glycolytic metabolism enhances CD8<sup>+</sup> T cell memory and antitumor function. *J Clin Invest.* 2013;123(10):4479–88. <https://doi.org/10.1172/JCI69589> PMID: [24091329](https://pubmed.ncbi.nlm.nih.gov/24091329/)
78. Baessler A, Vignali DAA. T cell exhaustion. *Annu Rev Immunol.* 2024;42(1):179–206.
79. Chen Z, et al. TCF-1-centered transcriptional network drives an effector versus exhausted CD8 T cell-fate decision. *Immunity.* 2019;51(5):840–55. e5.
80. Humblin E, Korpas I, Lu J, Filipescu D, van der Heide V, Goldstein S, et al. Sustained CD28 costimulation is required for self-renewal and differentiation of TCF-1<sup>+</sup> PD-1<sup>+</sup> CD8 T cells. *Sci Immunol.* 2023;8(86):eadg0878. <https://doi.org/10.1126/sciimmunol.adg0878> PMID: [37624910](https://pubmed.ncbi.nlm.nih.gov/37624910/)
81. Wu H, et al. Mitochondrial dysfunction promotes the transition of precursor to terminally exhausted T cells through HIF-1 $\alpha$ -mediated glycolytic reprogramming. *Nat Commun.* 2023;14(1):6858.
82. Markowitz GJ, et al. Deficiency of metabolic regulator PKM2 activates the pentose phosphate pathway and generates TCF1<sup>+</sup> progenitor CD8<sup>+</sup> T cells to improve immunotherapy. *Nat Immunol.* 2024;25(10):1884–99.
83. Han C, Ge M, Ho P-C, Zhang L. Fueling T-cell antitumor immunity: amino acid metabolism revisited. *Cancer Immunol Res.* 2021;9(12):1373–82. <https://doi.org/10.1158/2326-6066.CIR-21-0459> PMID: [34716193](https://pubmed.ncbi.nlm.nih.gov/34716193/)
84. Shen H, Ojo OA, Ding H, Mullen LJ, Xing C, Hossain MI, et al. HIF1 $\alpha$ -regulated glycolysis promotes activation-induced cell death and IFN- $\gamma$  induction in hypoxic T cells. *Nat Commun.* 2024;15(1):9394. <https://doi.org/10.1038/s41467-024-53593-8> PMID: [39477954](https://pubmed.ncbi.nlm.nih.gov/39477954/)
85. Chi H. Regulation and function of mTOR signalling in T cell fate decisions. *Nat Rev Immunol.* 2012;12(5):325–38. <https://doi.org/10.1038/nri3198> PMID: [22517423](https://pubmed.ncbi.nlm.nih.gov/22517423/)
86. Best SA, et al. Glutaminase inhibition impairs CD8 T cell activation in STK11<sup>-</sup>/Lkb1<sup>-</sup> deficient lung cancer. *Cell Metabolism.* 2022;34(6).
87. Carr EL, Kelman A, Wu GS, Gopaul R, Senkevitch E, Aghvanyan A, et al. Glutamine uptake and metabolism are coordinately regulated by ERK/MAPK during T lymphocyte activation. *J Immunol.* 2010;185(2):1037–44. <https://doi.org/10.4049/jimmunol.0903586> PMID: [20554958](https://pubmed.ncbi.nlm.nih.gov/20554958/)
88. Ma G, Zhang Z, Li P, Zhang Z, Zeng M, Liang Z, et al. Reprogramming of glutamine metabolism and its impact on immune response in the tumor microenvironment. *Cell Commun Signal.* 2022;20(1):114. <https://doi.org/10.1186/s12964-022-00909-0> PMID: [35897036](https://pubmed.ncbi.nlm.nih.gov/35897036/)
89. Bopp L, et al. Glutamine promotes human CD8<sup>+</sup> T cells and counteracts imiquimod-induced T cell hyporesponsiveness. *IScience.* 2024;27(5):109767.
90. Nabe S, Yamada T, Suzuki J, Toriyama K, Yasuoka T, Kuwahara M, et al. Reinforce the antitumor activity of CD8<sup>+</sup> T cells via glutamine restriction. *Cancer Sci.* 2018;109(12):3737–50. <https://doi.org/10.1111/cas.13827> PMID: [30302856](https://pubmed.ncbi.nlm.nih.gov/30302856/)
91. Geiger R, Rieckmann JC, Wolf T, Basso C, Feng Y, Fuhrer T, et al. L-arginine modulates T cell metabolism and enhances survival and anti-tumor activity. *Cell.* 2016;167(3):829–42. e13. <https://doi.org/10.1016/j.cell.2016.09.031> PMID: [27745970](https://pubmed.ncbi.nlm.nih.gov/27745970/)
92. Wu J, Li G, Li L, Li D, Dong Z, Jiang P. Asparagine enhances LCK signalling to potentiate CD8<sup>+</sup> T-cell activation and anti-tumour responses. *Nat Cell Biol.* 2021;23(1):75–86. <https://doi.org/10.1038/s41556-020-00615-4> PMID: [33420490](https://pubmed.ncbi.nlm.nih.gov/33420490/)
93. Chang HC, et al. Asparagine deprivation enhances T cell antitumour response in patients via ROS-mediated metabolic and signal adaptations. *Nature Metabolism.* 2025.
94. Chi F, et al. Dietary cysteine enhances intestinal stemness via CD8 T cell-derived IL-22. *BioRxiv.* 2025.
95. Pan X, Wang J, Zhang L, Li G, Huang B. Metabolic plasticity of T cell fate decision. *Chin Med J (Engl).* 2024;137(7):762–75. <https://doi.org/10.1097/CM9.0000000000002989> PMID: [38086394](https://pubmed.ncbi.nlm.nih.gov/38086394/)
96. Hunt EG, et al. Acetyl-CoA carboxylase obstructs CD8<sup>+</sup> T cell lipid utilization in the tumor microenvironment. *Cell Metab.* 2024;36(5).

97. Lim SA, Su W, Chapman NM, Chi H. Lipid metabolism in T cell signaling and function. *Nat Chem Biol.* 2022;18(5):470–81. <https://doi.org/10.1038/s41589-022-01017-3> PMID: [35484263](https://pubmed.ncbi.nlm.nih.gov/35484263/)
98. Pearce EL, Walsh MC, Cejas PJ, Harms GM, Shen H, Wang L-S, et al. Enhancing CD8 T-cell memory by modulating fatty acid metabolism. *Nature.* 2009;460(7251):103–7. <https://doi.org/10.1038/nature08097> PMID: [19494812](https://pubmed.ncbi.nlm.nih.gov/19494812/)
99. Raud B, Roy DG, Divakaruni AS, Tarasenko TN, Franke R, Ma EH, et al. Etomoxir actions on regulatory and memory T cells are independent of Cpt1a-mediated fatty acid oxidation. *Cell Metab.* 2018;28(3):504–515.e7. <https://doi.org/10.1016/j.cmet.2018.06.002> PMID: [30043753](https://pubmed.ncbi.nlm.nih.gov/30043753/)
100. van der Windt GJW, Everts B, Chang C-H, Curtis JD, Freitas TC, Amiel E, et al. Mitochondrial respiratory capacity is a critical regulator of CD8<sup>+</sup> T cell memory development. *Immunity.* 2012;36(1):68–78. <https://doi.org/10.1016/j.immuni.2011.12.007> PMID: [22206904](https://pubmed.ncbi.nlm.nih.gov/22206904/)
101. Ma X, et al. CD36-mediated ferroptosis dampens intratumoral CD8<sup>+</sup> T cell effector function and impairs their antitumor ability. *Cell Metab.* 2021;33(5).
102. Xu S, et al. Uptake of oxidized lipids by the scavenger receptor CD36 promotes lipid peroxidation and dysfunction in CD8<sup>+</sup> T cells in tumors. *Immunity.* 2021;54(7).
103. Manzo T, et al. Accumulation of long-chain fatty acids in the tumor microenvironment drives dysfunction in intrapancreatic CD8 T cells. *J Exp Med.* 2020;217(8).
104. Hwang S-M, Awasthi D, Jeong J, Sandoval TA, Chae C-S, Ramos Y, et al. Transgelin 2 guards T cell lipid metabolism and antitumor function. *Nature.* 2024;635(8040):1010–8. <https://doi.org/10.1038/s41586-024-08071-y> PMID: [39443795](https://pubmed.ncbi.nlm.nih.gov/39443795/)
105. Ichiyama K, Long J, Kobayashi Y, Horita Y, Kinoshita T, Nakamura Y, et al. Transcription factor Irf1 associates with Foxp3 to repress gene expression in Treg cells and limit autoimmunity and anti-tumor immunity. *Immunity.* 2024;57(9):2043–2060.e10. <https://doi.org/10.1016/j.immuni.2024.07.010> PMID: [39111316](https://pubmed.ncbi.nlm.nih.gov/39111316/)
106. Anvar MT, Rashidan K, Arsam N, Rasouli-Saravani A, Yadegari H, Ahmadi A, et al. Th17 cell function in cancers: immunosuppressive agents or anti-tumor allies? *Cancer Cell Int.* 2024;24(1):355. <https://doi.org/10.1186/s12935-024-03525-9> PMID: [39465401](https://pubmed.ncbi.nlm.nih.gov/39465401/)
107. Son S, Nam J, Kim AS, Ahn J, Park KS, Phoo MT, et al. Induction of T-helper-17-cell-mediated anti-tumour immunity by pathogen-mimicking polymer nanoparticles. *Nat Biomed Eng.* 2023;7(1):72–84. <https://doi.org/10.1038/s41551-022-00973-4> PMID: [36564626](https://pubmed.ncbi.nlm.nih.gov/36564626/)
108. Kurniawan H, Franchina DG, Guerra L, Bonetti L, Baguet LS, Grusdat M, et al. Glutathione restricts serine metabolism to preserve regulatory T cell function. *Cell Metab.* 2020;31(5):920–36.e7. <https://doi.org/10.1016/j.cmet.2020.03.004> PMID: [32213345](https://pubmed.ncbi.nlm.nih.gov/32213345/)
109. De Rosa V, Galgani M, Porcellini A, Colamatteo A, Santopaolo M, Zuchegna C, et al. Glycolysis controls the induction of human regulatory T cells by modulating the expression of FOXP3 exon 2 splicing variants. *Nat Immunol.* 2015;16(11):1174–84. <https://doi.org/10.1038/ni.3269> PMID: [26414764](https://pubmed.ncbi.nlm.nih.gov/26414764/)
110. Lei X, et al. Augmenting antitumor efficacy of Th17-derived Th1 cells through IFN- $\gamma$ -induced type I interferon response network via IRF7. *Proc Natl Acad Sci U S A.* 2024;121(47):e2412120121.
111. Wittling MC, Knochelmann HM, Wyatt MM, Rangel Rivera GO, Cole AC, Lesinski GB, et al. Distinct host preconditioning regimens differentially impact the antitumor potency of adoptively transferred Th17 cells. *J Immunother Cancer.* 2024;12(6):e008715. <https://doi.org/10.1136/jitc-2023-008715> PMID: [38945552](https://pubmed.ncbi.nlm.nih.gov/38945552/)
112. Chowdhury NU, et al. Androgen signaling restricts glutaminolysis to drive sex-specific Th17 metabolism in allergic airway inflammation. *J Clin Invest.* 2024;134(23).
113. Subudhi I, Konieczny P, Prystupa A, Castillo RL, Sze-Tu E, Xing Y, et al. Metabolic coordination between skin epithelium and type 17 immunity sustains chronic skin inflammation. *Immunity.* 2024;57(7):1665–80.e7. <https://doi.org/10.1016/j.immuni.2024.04.022> PMID: [38772365](https://pubmed.ncbi.nlm.nih.gov/38772365/)
114. Wagner A, Wang C, Fessler J, DeTomaso D, Avila-Pacheco J, Kaminski J, et al. Metabolic modeling of single Th17 cells reveals regulators of autoimmunity. *Cell.* 2021;184(16):4168–85.e21. <https://doi.org/10.1016/j.cell.2021.05.045> PMID: [34216539](https://pubmed.ncbi.nlm.nih.gov/34216539/)
115. Xiao F, Rui K, Han M, Zou L, Huang E, Tian J, et al. Artesunate suppresses Th17 response via inhibiting IRF4-mediated glycolysis and ameliorates Sjögren's syndrome. *Signal Transduct Target Ther.* 2022;7(1):274. <https://doi.org/10.1038/s41392-022-01103-x> PMID: [36031634](https://pubmed.ncbi.nlm.nih.gov/36031634/)
116. Hochrein SM, Wu H, Eckstein M, Arrigoni L, Herman JS, Schumacher F, et al. The glucose transporter GLUT3 controls T helper 17 cell responses through glycolytic–epigenetic reprogramming. *Cell Metab.* 2022;34(4):516–532.e11. <https://doi.org/10.1016/j.cmet.2022.02.015> PMID: [35316657](https://pubmed.ncbi.nlm.nih.gov/35316657/)
117. Damasceno LEA, et al. PKM2 promotes Th17 cell differentiation and autoimmune inflammation by fine-tuning STAT3 activation. *J Exp Med.* 2020;217(10).
118. Chang C-H, Qiu J, O'Sullivan D, Buck MD, Noguchi T, Curtis JD, et al. Metabolic competition in the tumor microenvironment is a driver of cancer progression. *Cell.* 2015;162(6):1229–41. <https://doi.org/10.1016/j.cell.2015.08.016> PMID: [26321679](https://pubmed.ncbi.nlm.nih.gov/26321679/)
119. Finisguerra V, Dvorakova T, Formenti M, Van Meerbeeck P, Mignon L, Gallez B, et al. Metformin improves cancer immunotherapy by directly rescuing tumor-infiltrating CD8 T lymphocytes from hypoxia-induced immunosuppression. *J Immunother Cancer.* 2023;11(5):e005719. <https://doi.org/10.1136/jitc-2022-005719> PMID: [37147018](https://pubmed.ncbi.nlm.nih.gov/37147018/)
120. Yu T, Nie F-Q, Zhang Q, Yu S-K, Zhang M-L, Wang Q, et al. Effects of methionine deficiency on B7H3-DAP12-CAR-T cells in the treatment of lung squamous cell carcinoma. *Cell Death Dis.* 2024;15(1):12. <https://doi.org/10.1038/s41419-023-06376-w> PMID: [38182561](https://pubmed.ncbi.nlm.nih.gov/38182561/)

121. Edwards DN, Ngwa VM, Raybuck AL, Wang S, Hwang Y, Kim LC, et al. Selective glutamine metabolism inhibition in tumor cells improves antitumor T lymphocyte activity in triple-negative breast cancer. *J Clin Invest*. 2021;131(4):e140100. <https://doi.org/10.1172/JCI140100> PMID: [33320840](https://pubmed.ncbi.nlm.nih.gov/33320840/)
122. Sun Y, Zhou Y, Peng Q, Zhou W, Li X, Wang R, et al. SERINC2-mediated serine metabolism promotes cervical cancer progression and drives T cell exhaustion. *Int J Biol Sci*. 2025;21(3):1361–77. <https://doi.org/10.7150/ijbs.105572> PMID: [39897034](https://pubmed.ncbi.nlm.nih.gov/39897034/)
123. Cheng H, Qiu Y, Xu Y, Chen L, Ma K, Tao M, et al. Extracellular acidosis restricts one-carbon metabolism and preserves T cell stemness. *Nat Metab*. 2023;5(2):314–30. <https://doi.org/10.1038/s42255-022-00730-6> PMID: [36717749](https://pubmed.ncbi.nlm.nih.gov/36717749/)
124. Feng Q, Liu Z, Yu X, Huang T, Chen J, Wang J, et al. Lactate increases stemness of CD8<sup>+</sup> T cells to augment anti-tumor immunity. *Nat Commun*. 2022;13(1):4981. <https://doi.org/10.1038/s41467-022-32521-8> PMID: [36068198](https://pubmed.ncbi.nlm.nih.gov/36068198/)
125. Zhang X-Y, Shi J-B, Jin S-F, Wang R-J, Li M-Y, Zhang Z-Y, et al. Metabolic landscape of head and neck squamous cell carcinoma informs a novel kynurenine/Siglec-15 axis in immune escape. *Cancer Commun (Lond)*. 2024;44(6):670–94. <https://doi.org/10.1002/cac2.12545> PMID: [38734931](https://pubmed.ncbi.nlm.nih.gov/38734931/)
126. Liu Y, Liang X, Dong W, Fang Y, Lv J, Zhang T, et al. Tumor-repopulating cells induce PD-1 expression in CD8<sup>+</sup> T cells by transferring kynurenine and AhR activation. *Cancer Cell*. 2018;33(3):480–494.e7. <https://doi.org/10.1016/j.ccell.2018.02.005> PMID: [29533786](https://pubmed.ncbi.nlm.nih.gov/29533786/)
127. Hu C, et al. Tumor-secreted FGF21 acts as an immune suppressor by rewiring cholesterol metabolism of CD8<sup>+</sup> T cells. *Cell Metabolism*. 2024;36(3).
128. Elewaut A, Estivill G, Bayerl F, Castillon L, Novatchkova M, Pottendorfer E, et al. Cancer cells impair monocyte-mediated T cell stimulation to evade immunity. *Nature*. 2025;637(8046):716–25. <https://doi.org/10.1038/s41586-024-08257-4> PMID: [39604727](https://pubmed.ncbi.nlm.nih.gov/39604727/)
129. Morotti M, et al. PGE2 inhibits TIL expansion by disrupting IL-2 signalling and mitochondrial function. *Nature*. 2024;629(8011):426–34.
130. Lacher SB, Dörr J, de Almeida GP, Hönninger J, Bayerl F, Hirschberger A, et al. PGE2 limits effector expansion of tumour-infiltrating stem-like CD8<sup>+</sup> T cells. *Nature*. 2024;629(8011):417–25. <https://doi.org/10.1038/s41586-024-07254-x> PMID: [38658748](https://pubmed.ncbi.nlm.nih.gov/38658748/)
131. Cheng J, et al. Cancer-cell-derived fumarate suppresses the anti-tumor capacity of CD8<sup>+</sup> T cells in the tumor microenvironment. *Cell Metab*. 2023;35(6).
132. Lim SA, et al. Lipid metabolism in T cell signaling and function. *Nat Chem Biol*. 2022;18(5):470–81.
133. Ding R, et al. Lactate modulates RNA splicing to promote CTLA-4 expression in tumor-infiltrating regulatory T cells. *Immunity*. 2024;57(3):528–40.e6.
134. Kang JH, Zappasodi R. Modulating Treg stability to improve cancer immunotherapy. *Trends Cancer*. 2023;9(11):911–27. <https://doi.org/10.1016/j.trecan.2023.07.015> PMID: [37598003](https://pubmed.ncbi.nlm.nih.gov/37598003/)
135. Van Damme H, Dombrecht B, Kiss M, Roose H, Allen E, Van Overmeire E, et al. Therapeutic depletion of CCR8<sup>+</sup> tumor-infiltrating regulatory T cells elicits antitumor immunity and synergizes with anti-PD-1 therapy. *J Immunother Cancer*. 2021;9(2):e001749. <https://doi.org/10.1136/jitc-2020-001749> PMID: [33589525](https://pubmed.ncbi.nlm.nih.gov/33589525/)
136. Churov A, Zhulai G. Targeting adenosine and regulatory T cells in cancer immunotherapy. *Hum Immunol*. 2021;82(4):270–8.
137. Zhang X, Greve PF, Minh TTN, Wubbolts R, Demir AY, Zaal EA, et al. Extracellular vesicles from seminal plasma interact with T cells in vitro and drive their differentiation into regulatory T-cells. *J Extracell Vesicles*. 2024;13(7):e12457. <https://doi.org/10.1002/jev2.12457> PMID: [39007430](https://pubmed.ncbi.nlm.nih.gov/39007430/)
138. Zhou Y, Kang L, Yin G, Yang L, Chen B, Liu B, et al. Adenosine A2B receptor activation regulates the balance between T helper 17 cells and regulatory T cells, and inhibits regulatory T cells exhaustion in experimental autoimmune myositis. *J Cachexia Sarcopenia Muscle*. 2024;15(6):2460–75. <https://doi.org/10.1002/jcsm.13581> PMID: [39284778](https://pubmed.ncbi.nlm.nih.gov/39284778/)
139. Paz Del Socorro T, et al. The biotherapeutic *Clostridium butyricum* MIYAIRI 588 strain potentiates enterotropism of Rorγ<sup>+</sup> Treg and PD-1 blockade efficacy. *Gut Microbes*. 2024;16(1):2315631.
140. El-Behi M, et al. The encephalitogenicity of T(H)17 cells is dependent on IL-1- and IL-23-induced production of the cytokine GM-CSF. *Nat Immunol*. 2011;12(6):568–75.
141. Noster R, Riedel R, Mashreghi M-F, Radbruch H, Harms L, Haftmann C, et al. IL-17 and GM-CSF expression are antagonistically regulated by human T helper cells. *Sci Transl Med*. 2014;6(241):241ra80. <https://doi.org/10.1126/scitranslmed.3008706> PMID: [24944195](https://pubmed.ncbi.nlm.nih.gov/24944195/)
142. Liu B, Tan W, Barsoum A, Gu X, Chen K, Huang W, et al. IL-17 is a potent synergistic factor with GM-CSF in mice in stimulating myelopoiesis, dendritic cell expansion, proliferation, and functional enhancement. *Exp Hematol*. 2010;38(10):877–884.e1. <https://doi.org/10.1016/j.exphem.2010.06.004> PMID: [20600582](https://pubmed.ncbi.nlm.nih.gov/20600582/)
143. Liu X, Wang X, Yang Q, Luo L, Liu Z, Ren X, et al. Th17 cells secrete TWEAK to trigger epithelial–mesenchymal transition and promote colorectal cancer liver metastasis. *Cancer Res*. 2024;84(8):1352–71. <https://doi.org/10.1158/0008-5472.CAN-23-2123> PMID: [38335276](https://pubmed.ncbi.nlm.nih.gov/38335276/)
144. Seif F, Torki Z, Zalpoor H, Habibi M, Pornour M. Breast cancer tumor microenvironment affects Treg/IL-17-producing Treg/Th17 cell axis: molecular and therapeutic perspectives. *Mol Ther Oncolytics*. 2023;28:132–57. <https://doi.org/10.1016/j.omto.2023.01.001> PMID: [36816749](https://pubmed.ncbi.nlm.nih.gov/36816749/)
145. Liu W, et al. IL-17A promotes the migration, invasion and the EMT process of lung cancer accompanied by NLRP3 activation. *Biomed Res Int*. 2022;7841279.
146. Li S, Cong X, Gao H, Lan X, Li Z, Wang W, et al. Tumor-associated neutrophils induce EMT by IL-17a to promote migration and invasion in gastric cancer cells. *J Exp Clin Cancer Res*. 2019;38(1):6. <https://doi.org/10.1186/s13046-018-1003-0> PMID: [30616627](https://pubmed.ncbi.nlm.nih.gov/30616627/)

147. Chen K, Tang H, Zhu P, Ye J, Liu D, Pu Y, et al. Interleukin 17A promotes gallbladder cancer invasiveness via ERK/NF- $\kappa$ B signal pathway mediated epithelial-to-mesenchymal transition. *J Cancer*. 2020;11(15):4406–12. <https://doi.org/10.7150/jca.40656> PMID: [32489459](https://pubmed.ncbi.nlm.nih.gov/32489459/)
148. Winter J, et al. Targeting of glucose transport and the NAD pathway in neuroendocrine tumor (NET) cells reveals new treatment options. *Cancers*. 2023;15(5).
149. Kraus D, Reckenbeil J, Veit N, Kuerpig S, Meisenheimer M, Beier I, et al. Targeting glucose transport and the NAD pathway in tumor cells with STF-31: a re-evaluation. *Cell Oncol (Dordr)*. 2018;41(5):485–94. <https://doi.org/10.1007/s13402-018-0385-5> PMID: [29949049](https://pubmed.ncbi.nlm.nih.gov/29949049/)
150. Jia Y, Li H-Y, Wang Y, Wang J, Zhu J-W, Wei Y-Y, et al. Crosstalk between hypoxia-sensing ULK1/2 and YAP-driven glycolysis fuels pancreatic ductal adenocarcinoma development. *Int J Biol Sci*. 2021;17(11):2772–94. <https://doi.org/10.7150/ijbs.60018> PMID: [34345207](https://pubmed.ncbi.nlm.nih.gov/34345207/)
151. He Z, Zhong Y, Lv T, Wang J, Jin Y, Li F, et al. PP4R1 promotes glycolysis and gallbladder cancer progression through facilitating ERK1/2 mediated PKM2 nuclear translocation. *Cancer Lett*. 2024;586:216677. <https://doi.org/10.1016/j.canlet.2024.216677> PMID: [38301910](https://pubmed.ncbi.nlm.nih.gov/38301910/)
152. Li F, He C, Yao H, Zhao Y, Ye X, Zhou S, et al. Glutamate from nerve cells promotes perineural invasion in pancreatic cancer by regulating tumor glycolysis through HK2 mRNA-m6A modification. *Pharmacol Res*. 2023;187:106555. <https://doi.org/10.1016/j.phrs.2022.106555> PMID: [36403721](https://pubmed.ncbi.nlm.nih.gov/36403721/)
153. Bastin J, et al. Downregulation of mitochondrial complex I induces ROS production in colorectal cancer subtypes that differently controls migration. *J Transl Med*. 2023;21(1):522.
154. Mangalhara KC, Varanasi SK, Johnson MA, Burns MJ, Rojas GR, Esparza Moltó PB, et al. Manipulating mitochondrial electron flow enhances tumor immunogenicity. *Science*. 2023;381(6664):1316–23. <https://doi.org/10.1126/science.abq1053> PMID: [37733872](https://pubmed.ncbi.nlm.nih.gov/37733872/)
155. Bezwada D, Perelli L, Lesner NP, Cai L, Brooks B, Wu Z, et al. Mitochondrial complex I promotes kidney cancer metastasis. *Nature*. 2024;633(8031):923–31. <https://doi.org/10.1038/s41586-024-07812-3> PMID: [39143213](https://pubmed.ncbi.nlm.nih.gov/39143213/)
156. Wheaton WW, Weinberg SE, Hamanaka RB, Soberanes S, Sullivan LB, Anso E, et al. Metformin inhibits mitochondrial complex I of cancer cells to reduce tumorigenesis. *Elife*. 2014;3:e02242. <https://doi.org/10.7554/eLife.02242> PMID: [24843020](https://pubmed.ncbi.nlm.nih.gov/24843020/)
157. Pujalte-Martin M, Belaïd A, Bost S, Kahi M, Peraldi P, Rouleau M, et al. Targeting cancer and immune cell metabolism with the complex I inhibitors metformin and IACS-010759. *Mol Oncol*. 2024;18(7):1719–38. <https://doi.org/10.1002/1878-0261.13583> PMID: [38214418](https://pubmed.ncbi.nlm.nih.gov/38214418/)
158. Yap TA, et al. Complex I inhibitor of oxidative phosphorylation in advanced solid tumors and acute myeloid leukemia: phase I trials. *Nat Med*. 2023;29(1):115–26.
159. Kim HJ, Kwon H, Lee JW, Kim HJ, Lee SB, Park HS, et al. Metformin increases survival in hormone receptor-positive, HER2-positive breast cancer patients with diabetes. *Breast Cancer Res*. 2015;17(1):64. <https://doi.org/10.1186/s13058-015-0574-3> PMID: [25935404](https://pubmed.ncbi.nlm.nih.gov/25935404/)
160. Jiang N, Xie B, Xiao W, Fan M, Xu S, Duan Y, et al. Fatty acid oxidation fuels glioblastoma radioresistance with CD47-mediated immune evasion. *Nat Commun*. 2022;13(1):1511. <https://doi.org/10.1038/s41467-022-29137-3> PMID: [35314680](https://pubmed.ncbi.nlm.nih.gov/35314680/)
161. Della Corte CM, Ciarabella V, Ramkumar K, Vicidomini G, Fiorelli A, Nardone V, et al. Triple blockade of Ido-1, PD-L1 and MEK as a potential therapeutic strategy in NSCLC. *J Transl Med*. 2022;20(1):541. <https://doi.org/10.1186/s12967-022-03730-y> PMID: [36419183](https://pubmed.ncbi.nlm.nih.gov/36419183/)
162. Kjeldsen JW, Lorentzen CL, Martinenaite E, Ellebaek E, Donia M, Holmstroem RB, et al. A phase 1/2 trial of an immune-modulatory vaccine against IDO/PD-L1 in combination with nivolumab in metastatic melanoma. *Nat Med*. 2021;27(12):2212–23. <https://doi.org/10.1038/s41591-021-01544-x> PMID: [34887574](https://pubmed.ncbi.nlm.nih.gov/34887574/)
163. Mullard A. IDO takes a blow. *Nat Rev Drug Discov*. 2018;17(5):307. <https://doi.org/10.1038/nrd.2018.67> PMID: [29700490](https://pubmed.ncbi.nlm.nih.gov/29700490/)
164. Liu Z, Hu M, Yang Y, Du C, Zhou H, Liu C, et al. An overview of PROTACs: a promising drug discovery paradigm. *Mol Biomed*. 2022;3(1):46. <https://doi.org/10.1186/s43556-022-00112-0> PMID: [36536188](https://pubmed.ncbi.nlm.nih.gov/36536188/)
165. Kawalekar OU, O'Connor RS, Fraietta JA, Guo L, McGettigan SE, Posey AD Jr, et al. Distinct signaling of coreceptors regulates specific metabolism pathways and impacts memory development in CAR T cells. *Immunity*. 2016;44(2):380–90. <https://doi.org/10.1016/j.immuni.2016.01.021> PMID: [26885860](https://pubmed.ncbi.nlm.nih.gov/26885860/)
166. Ung S, Choochuen P, Khopanlert W, Maneechai K, Sangkhathat S, Terakura S, et al. Enrichment of T-cell proliferation and memory gene signatures of CD79A/CD40 costimulatory domain potentiates CD19CAR-T cell functions. *Front Immunol*. 2022;13:1064339. <https://doi.org/10.3389/fimmu.2022.1064339> PMID: [36505428](https://pubmed.ncbi.nlm.nih.gov/36505428/)
167. Jackson CM, et al. The cytokine meteorin-like inhibits anti-tumor CD8<sup>+</sup> T cell responses by disrupting mitochondrial function. *Immunity*. 2024. 57(8).
168. Klysz DD, Fowler C, Malipatlolla M, Stuani L, Freitas KA, Chen Y, et al. Inosine induces stemness features in CAR-T cells and enhances potency. *Cancer Cell*. 2024;42(2):266–82.e8. <https://doi.org/10.1016/j.ccell.2024.01.002> PMID: [38278150](https://pubmed.ncbi.nlm.nih.gov/38278150/)
169. Tieu V, et al. A versatile CRISPR-Cas13d platform for multiplexed transcriptomic regulation and metabolic engineering in primary human T cells. *Cell*. 2024;187(5):1278–95.e20.
170. Giuffrida L, Sek K, Henderson MA, Lai J, Chen AXY, Meyran D, et al. CRISPR/Cas9 mediated deletion of the adenosine A2A receptor enhances CAR T cell efficacy. *Nat Commun*. 2021;12(1):3236. <https://doi.org/10.1038/s41467-021-23331-5> PMID: [34050151](https://pubmed.ncbi.nlm.nih.gov/34050151/)
171. Qiu Y, et al. Mannose metabolism reshapes T cell differentiation to enhance anti-tumor immunity. *Cancer Cell*. 2025;43(1): p. 103–21.e8.
172. Wang Z, Guan D, Wang S, Chai LYA, Xu S, Lam K-P. Glycolysis and oxidative phosphorylation play critical roles in natural killer cell receptor-mediated natural killer cell functions. *Front Immunol*. 2020;11:202. <https://doi.org/10.3389/fimmu.2020.00202> PMID: [32153568](https://pubmed.ncbi.nlm.nih.gov/32153568/)

173. Elhage R, Kelly M, Goudin N, Megret J, Legrand A, Nemazanyy I, et al. Mitochondrial dynamics and metabolic regulation control T cell fate in the thymus. *Front Immunol.* 2024;14:1270268. <https://doi.org/10.3389/fimmu.2023.1270268> PMID: [38288115](https://pubmed.ncbi.nlm.nih.gov/38288115/)
174. Patsoukis N, Bardhan K, Chatterjee P, Sari D, Liu B, Bell LN, et al. PD-1 alters T-cell metabolic reprogramming by inhibiting glycolysis and promoting lipolysis and fatty acid oxidation. *Nat Commun.* 2015;6:6692. <https://doi.org/10.1038/ncomms7692> PMID: [25809635](https://pubmed.ncbi.nlm.nih.gov/25809635/)
175. Huang X, Sun T, Wang J, Hong X, Chen H, Yan T, et al. Metformin reprograms tryptophan metabolism to stimulate CD8<sup>+</sup> T-cell function in colorectal cancer. *Cancer Res.* 2023;83(14):2358–71. <https://doi.org/10.1158/0008-5472.CAN-22-3042> PMID: [37195082](https://pubmed.ncbi.nlm.nih.gov/37195082/)
176. Tokumasu M, Nishida M, Zhao W, Chao R, Imano N, Yamashita N, et al. Metformin synergizes with PD-1 blockade to promote normalization of tumor vessels via CD8T cells and IFN $\gamma$ . *Proc Natl Acad Sci U S A.* 2024;121(30):e2404778121. <https://doi.org/10.1073/pnas.2404778121> PMID: [39018197](https://pubmed.ncbi.nlm.nih.gov/39018197/)
177. Cavazzoni A, et al. Pemetrexed enhances membrane PD-L1 expression and potentiates T cell-mediated cytotoxicity by anti-PD-L1 antibody therapy in non-small-cell lung cancer. *Cancers.* 2020;12(3).
178. Awad MM, Govindan R, Balogh KN, Spigel DR, Garon EB, Bushway ME, et al. Personalized neoantigen vaccine NEO-PV-01 with chemotherapy and anti-PD-1 as first-line treatment for non-squamous non-small cell lung cancer. *Cancer Cell.* 2022;40(9):1010-1026.e11. <https://doi.org/10.1016/j.ccell.2022.08.003> PMID: [36027916](https://pubmed.ncbi.nlm.nih.gov/36027916/)
179. Zhang R, et al. D-mannose facilitates immunotherapy and radiotherapy of triple-negative breast cancer via degradation of PD-L1. *Proc Natl Acad Sci U S A.* 2022;119(8).
180. Fang Y, Liu W, Tang Z, Ji X, Zhou Y, Song S, et al. Monocarboxylate transporter 4 inhibition potentiates hepatocellular carcinoma immunotherapy through enhancing T cell infiltration and immune attack. *Hepatology.* 2023;77(1):109–23. <https://doi.org/10.1002/hep.32348> PMID: [35043976](https://pubmed.ncbi.nlm.nih.gov/35043976/)
181. Klotz L, Eschborn M, Lindner M, Liebmann M, Herold M, Janoschka C, et al. Teriflunomide treatment for multiple sclerosis modulates T cell mitochondrial respiration with affinity-dependent effects. *Sci Transl Med.* 2019;11(490):eaao5563. <https://doi.org/10.1126/scitranslmed.aao5563> PMID: [31043571](https://pubmed.ncbi.nlm.nih.gov/31043571/)
182. Jin H-R, Wang J, Wang Z-J, Xi M-J, Xia B-H, Deng K, et al. Lipid metabolic reprogramming in tumor microenvironment: from mechanisms to therapeutics. *J Hematol Oncol.* 2023;16(1):103. <https://doi.org/10.1186/s13045-023-01498-2> PMID: [37700339](https://pubmed.ncbi.nlm.nih.gov/37700339/)
183. Liu X, Hartman CL, Li L, Albert CJ, Si F, Gao A, et al. Reprogramming lipid metabolism prevents effector T cell senescence and enhances tumor immunotherapy. *Sci Transl Med.* 2021;13(587):eaaz6314. <https://doi.org/10.1126/scitranslmed.aaz6314> PMID: [33790024](https://pubmed.ncbi.nlm.nih.gov/33790024/)
184. Hu C, Qiao W, Li X, Ning Z-K, Liu J, Dalangood S, et al. Tumor-secreted FGF21 acts as an immune suppressor by rewiring cholesterol metabolism of CD8<sup>+</sup> T cells. *Cell Metab.* 2024;36(5):1168. <https://doi.org/10.1016/j.cmet.2024.03.013> PMID: [38537635](https://pubmed.ncbi.nlm.nih.gov/38537635/)
185. Wu L, et al. Tumor aerobic glycolysis confers immune evasion through modulating sensitivity to T cell-mediated bystander killing via TNF- $\alpha$ . *Cell Metab.* 2023;35(9):1580–96.e9.
186. Ganapathy-Kanniappan S. Linking tumor glycolysis and immune evasion in cancer: Emerging concepts and therapeutic opportunities. *Biochim Biophys Acta Rev Cancer.* 2017;1868(1):212–20. <https://doi.org/10.1016/j.bbcan.2017.04.002> PMID: [28400131](https://pubmed.ncbi.nlm.nih.gov/28400131/)
187. Le X, Mu J, Peng W, Tang J, Xiang Q, Tian S, et al. DNA methylation downregulated ZDHHC1 suppresses tumor growth by altering cellular metabolism and inducing oxidative/ER stress-mediated apoptosis and pyroptosis. *Theranostics.* 2020;10(21):9495–511. <https://doi.org/10.7150/thno.45631> PMID: [32863941](https://pubmed.ncbi.nlm.nih.gov/32863941/)
188. Rowe JH, et al. Formate supplementation enhances antitumor CD8 T-cell fitness and efficacy of PD-1 blockade. *Cancer Discov.* 2023;13(12):2566–83.
189. Dai X, Bu X, Gao Y, Guo J, Hu J, Jiang C, et al. Energy status dictates PD-L1 protein abundance and anti-tumor immunity to enable checkpoint blockade. *Mol Cell.* 2021;81(11):2317-2331.e6. <https://doi.org/10.1016/j.molcel.2021.03.037> PMID: [33909988](https://pubmed.ncbi.nlm.nih.gov/33909988/)
190. Liu N, Yan M, Tao Q, Wu J, Chen J, Chen X, et al. Inhibition of TCA cycle improves the anti-PD-1 immunotherapy efficacy in melanoma cells via ATF3-mediated PD-L1 expression and glycolysis. *J Immunother Cancer.* 2023;11(9):e007146. <https://doi.org/10.1136/jitc-2023-007146> PMID: [37678921](https://pubmed.ncbi.nlm.nih.gov/37678921/)
191. Cadenas-De Miguel S, Lucianer G, Elia I. The metabolic cross-talk between cancer and T cells. *Trends Biochem Sci.* 2023;48(7):597–609.
192. Dey P, Kimmelman AC, DePinho RA. Metabolic codependencies in the tumor microenvironment. *Cancer Discov.* 2021;11(5):1067–81. <https://doi.org/10.1158/2159-8290.CD-20-1211> PMID: [33504580](https://pubmed.ncbi.nlm.nih.gov/33504580/)
193. Liang P, Li Z, Chen Z, Chen Z, Jin T, He F, et al. Metabolic reprogramming of glycolysis, lipids, and amino acids in tumors: impact on CD8<sup>+</sup> T cell function and targeted therapeutic strategies. *FASEB J.* 2025;39(8):e70520. <https://doi.org/10.1096/fj.202403019R> PMID: [40249661](https://pubmed.ncbi.nlm.nih.gov/40249661/)
194. Wan M, Ding Y, Li Z, Wang X, Xu M. Metabolic manipulation of the tumour immune microenvironment. *Immunology.* 2022;165(3):290–300. <https://doi.org/10.1111/imm.13444> PMID: [34962655](https://pubmed.ncbi.nlm.nih.gov/34962655/)
195. Lei J, et al. Taming metabolic competition via glycolysis inhibition for safe and potent tumor immunotherapy. *Biochem Pharmacol.* 2022;202:115153.
196. Cabezón-Gutiérrez L, Palka-Kotłowska M, Custodio-Cabello S, Chacón-Ovejero B, Pacheco-Barcia V. Metabolic mechanisms of immunotherapy resistance. *Explor Target Antitumor Ther.* 2025;6:1002297. <https://doi.org/10.37349/etat.2025.1002297> PMID: [40092297](https://pubmed.ncbi.nlm.nih.gov/40092297/)
